# Supplementary material
Source: Royal Society of Chemistry journal article supplement (doi:10.1039/d6md00221h)

## Supporting Information

### **Synthesis-guided design and discovery of alkylated indoles with antibacterial activity against MRSA**

**Auqib Rashid**<sup>1, 3, 4, #</sup>, **Vishwani Jamwal**<sup>2, 4, #</sup>, **Bilal A. Bhat**<sup>3, 4, \*</sup>, **Kuljit Singh**<sup>2, 4, \*</sup>,  
**Showkat Rashid**<sup>1, 4, \*</sup>

<sup>1</sup>*Natural Products and Medicinal Chemistry Division, CSIR- Indian Institute of Integrative  
Medicine, Jammu- 180001, India*

<sup>2</sup>*Infectious Diseases Division, CSIR- Indian Institute of Integrative Medicine, Jammu-180001,  
India*

<sup>3</sup>*Natural Products and Medicinal Chemistry Division, CSIR- Indian Institute of Integrative  
Medicine, Sanat Nagar, Srinagar- 190005, India*

<sup>4</sup>*Academy of Scientific and Innovative Research (AcSIR), Ghaziabad- 201002, India*

#Co-First Authors

#### **\*To whom correspondence should be addressed:**

Dr. Showkat Rashid, Natural Products and Medicinal Chemistry Division, CSIR- Indian  
Institute of Integrative Medicine, Jammu-180001, India. E-mail:

[showkatrashid.iiim@csir.res.in](mailto:showkatrashid.iiim@csir.res.in)

Dr. Kuljit Singh, Infectious Diseases Division, CSIR- Indian Institute of Integrative Medicine,  
Jammu-180001, India. E-mail: [singhkuljit.iiim@csir.res.in](mailto:singhkuljit.iiim@csir.res.in)

Dr. Bilal A Bhat, Natural Products and Medicinal Chemistry Division, CSIR- Indian Institute of  
Integrative Medicine, Sanat-Nagar, Srinagar-190005, India. E-mail: [bilalbhat.iiim@csir.res.in](mailto:bilalbhat.iiim@csir.res.in)

# NMR Spectra

<sup>1</sup>H NMR Spectrum of **11e** (400 MHz, CDCl<sub>3</sub>)

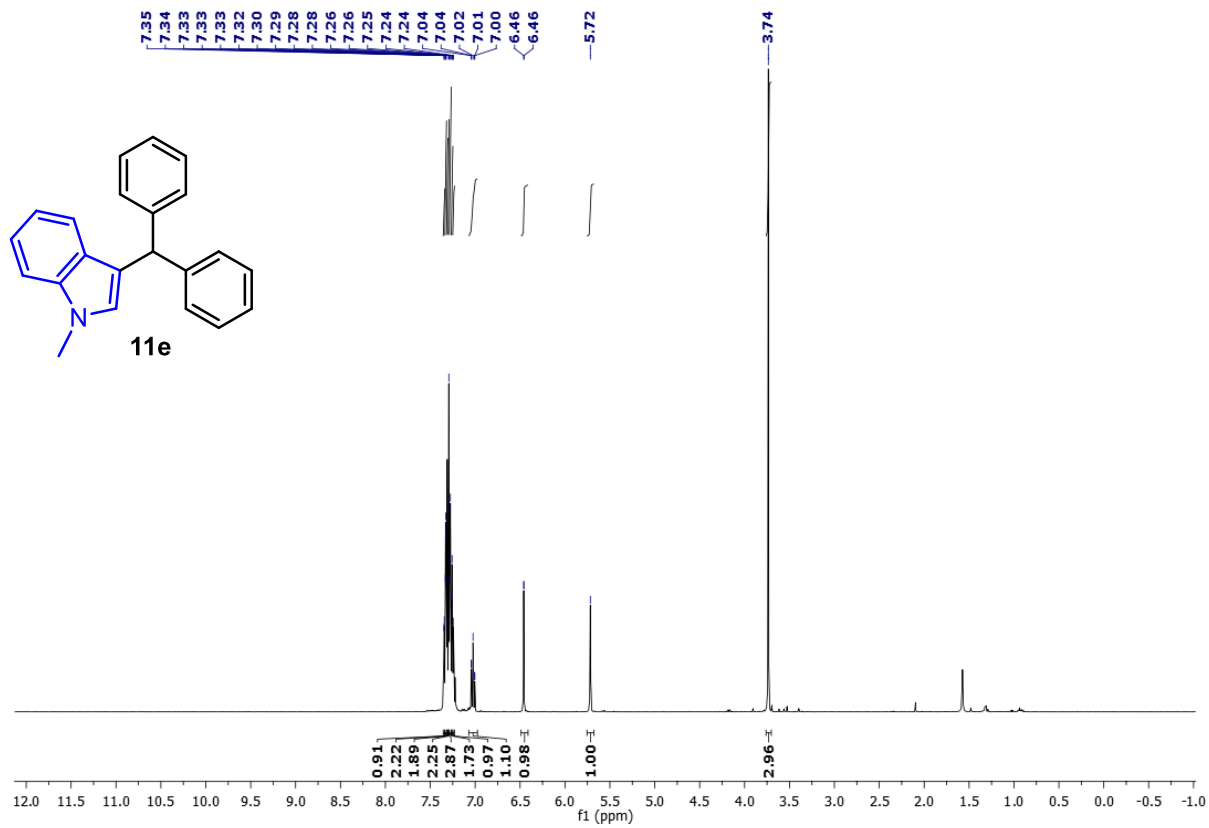

<sup>13</sup>C NMR Spectrum of **11e** (100 MHz, CDCl<sub>3</sub>)

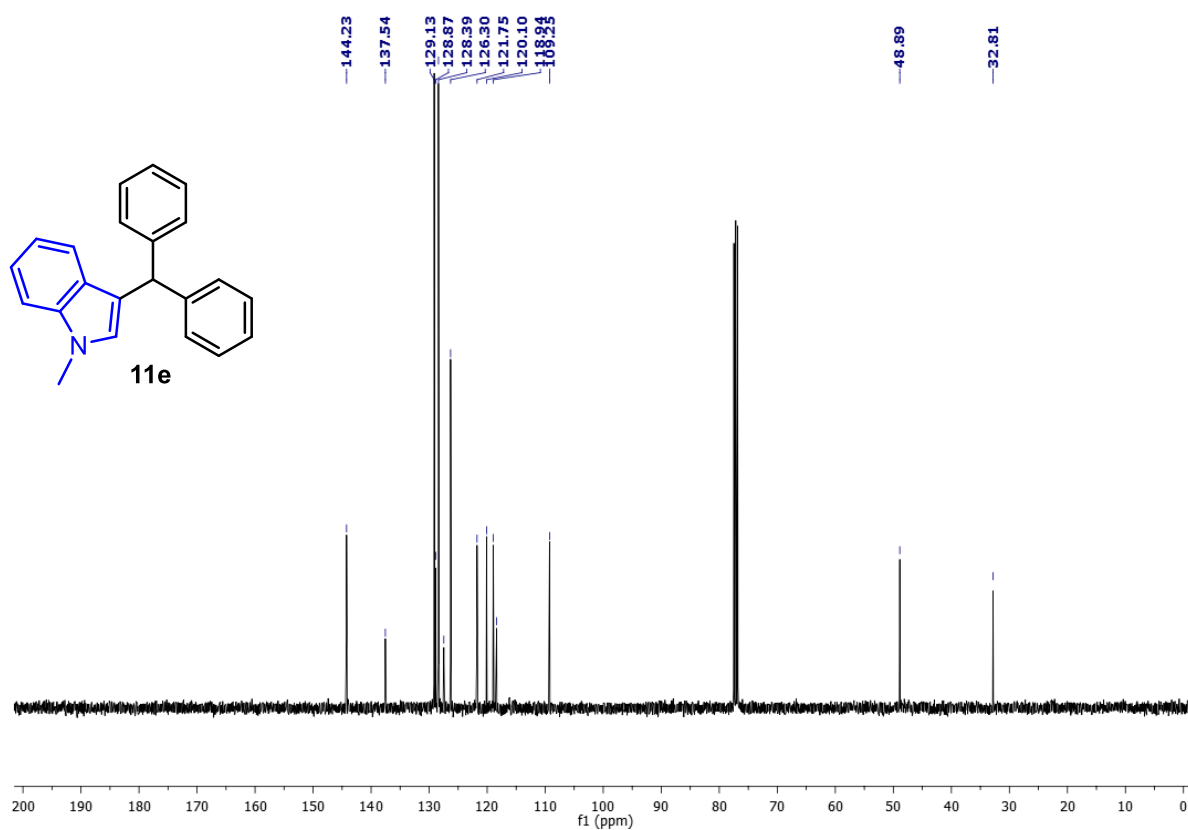

<sup>1</sup>H NMR Spectrum of **11i** (400 MHz, CDCl<sub>3</sub>)

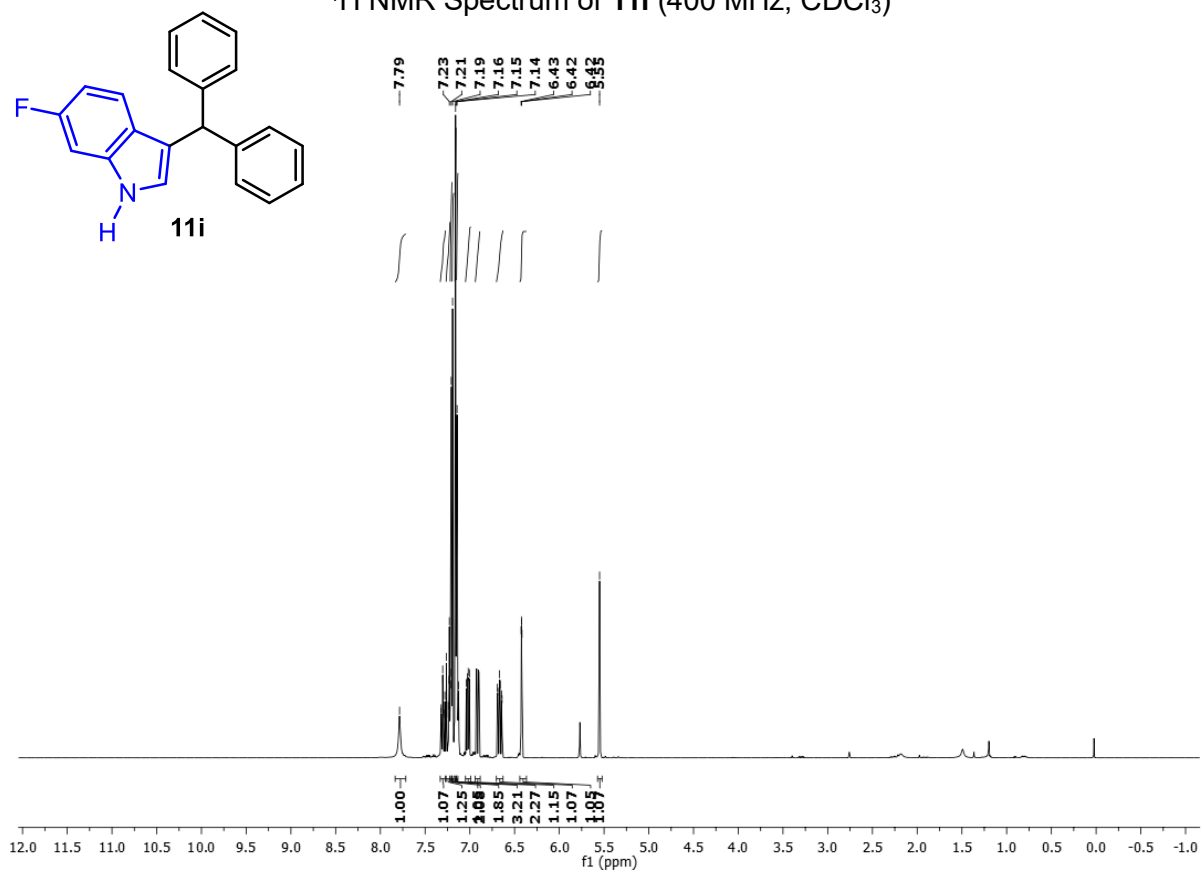

<sup>13</sup>C NMR Spectrum of **11i** (100 MHz, CDCl<sub>3</sub>)

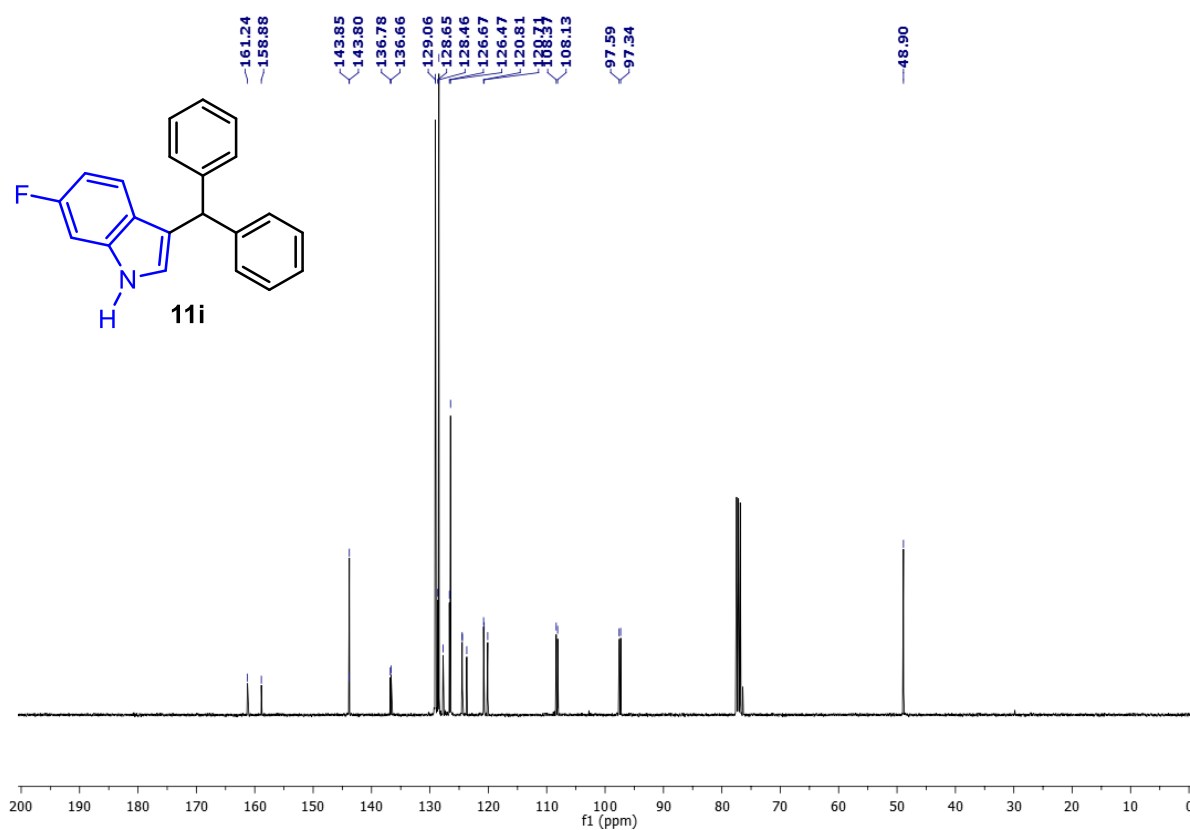

<sup>1</sup>H NMR Spectrum of **11j** (400 MHz, CDCl<sub>3</sub>)

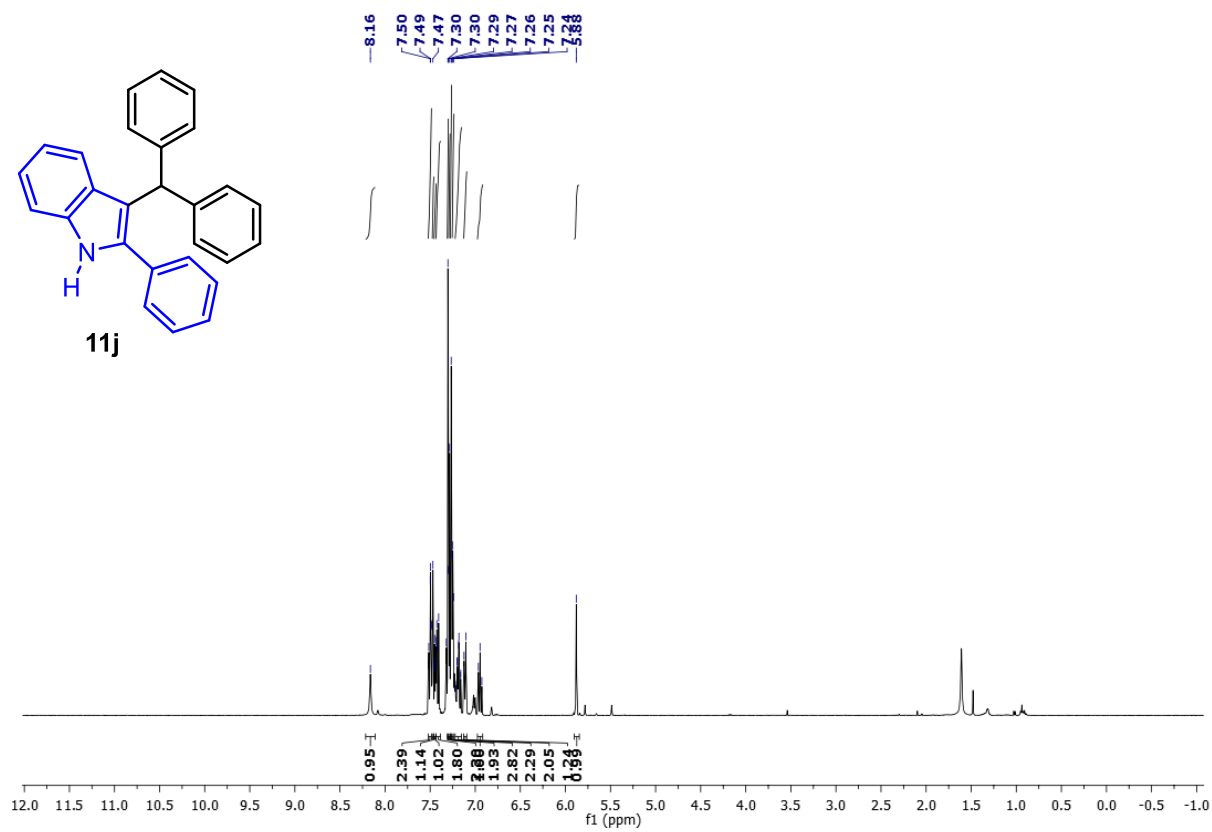

<sup>13</sup>C NMR Spectrum of **11j** (100 MHz, CDCl<sub>3</sub>)

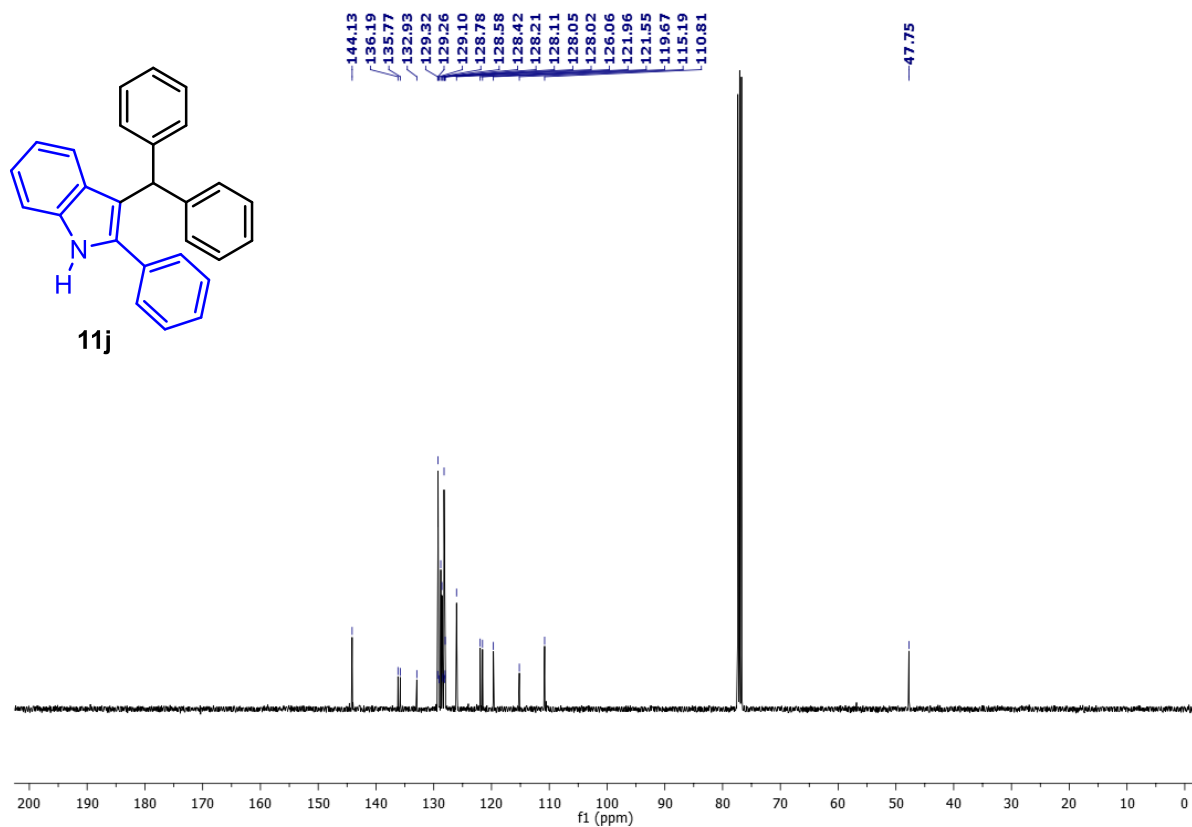

<sup>1</sup>H NMR Spectrum of **11k** (400 MHz, CDCl<sub>3</sub>)

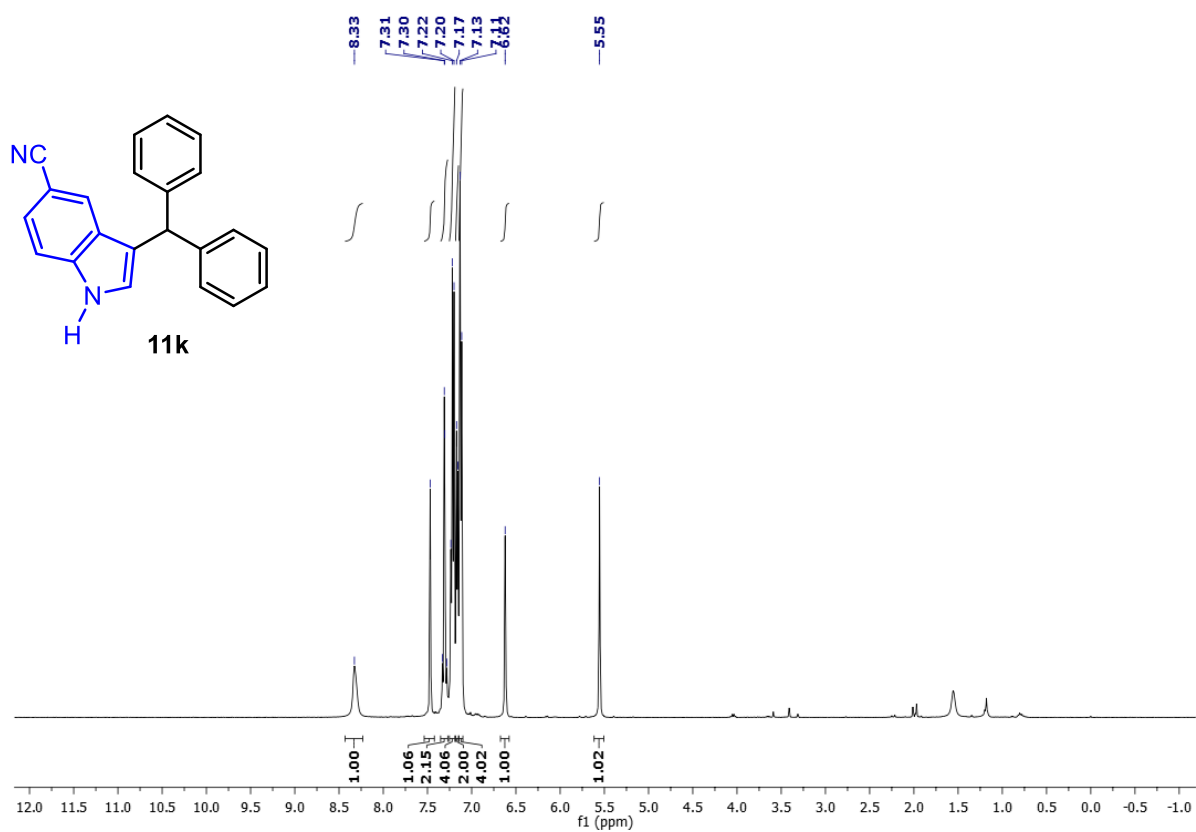

<sup>13</sup>C NMR Spectrum of **11k** (100 MHz, CDCl<sub>3</sub>)

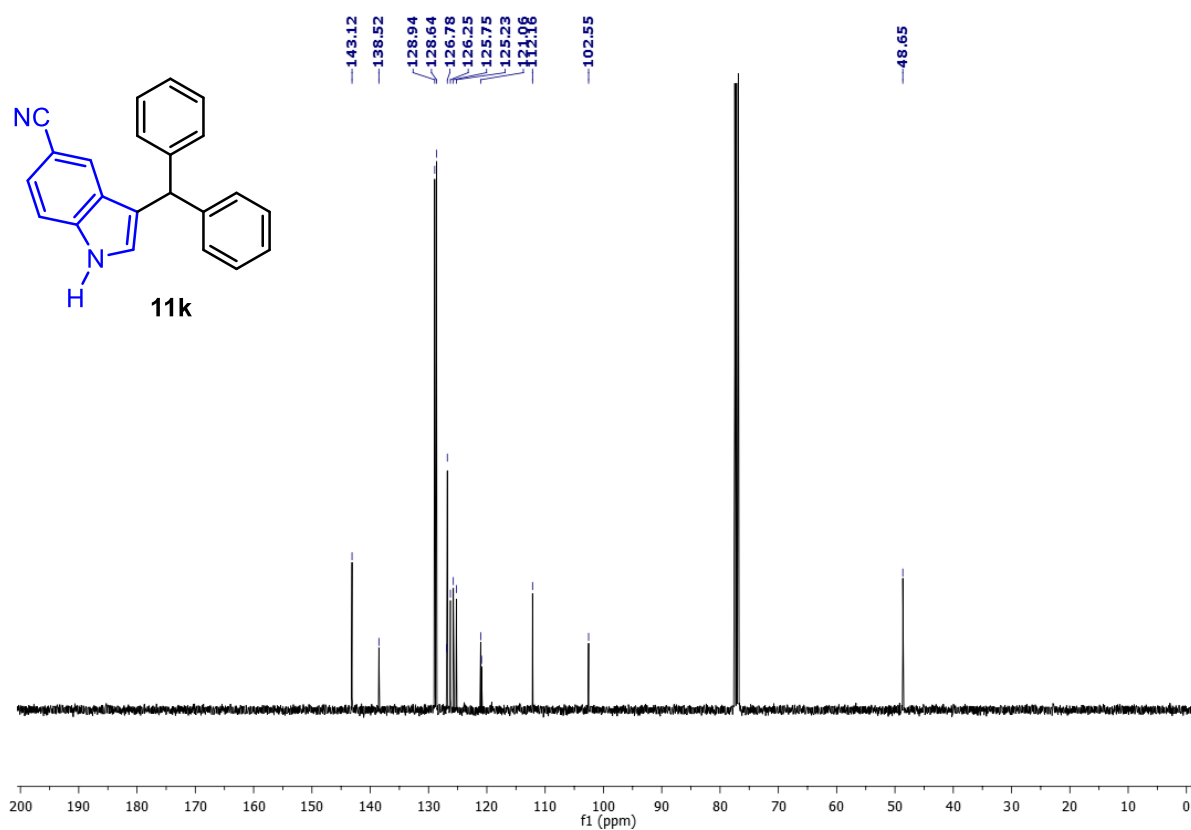

<sup>1</sup>H NMR Spectrum of **11l** (400 MHz, CDCl<sub>3</sub>)

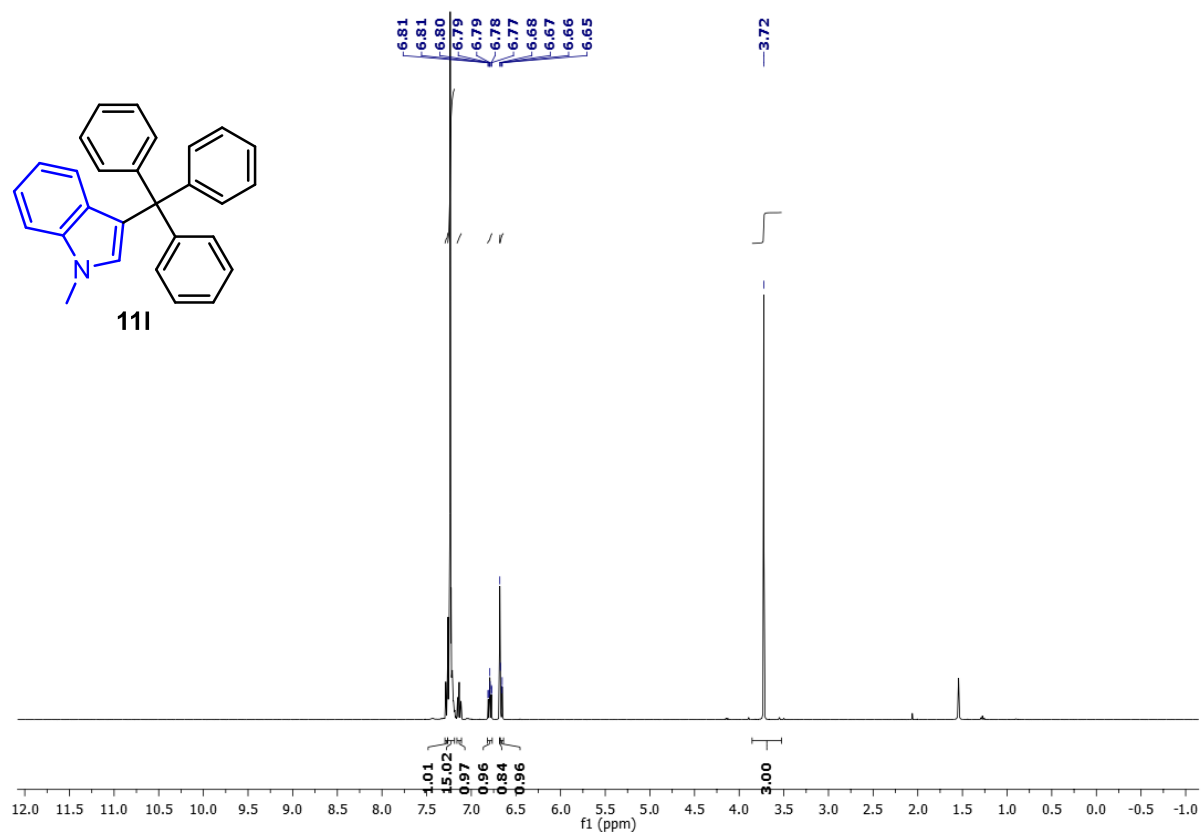

<sup>13</sup>C NMR Spectrum of **11l** (100 MHz, CDCl<sub>3</sub>)

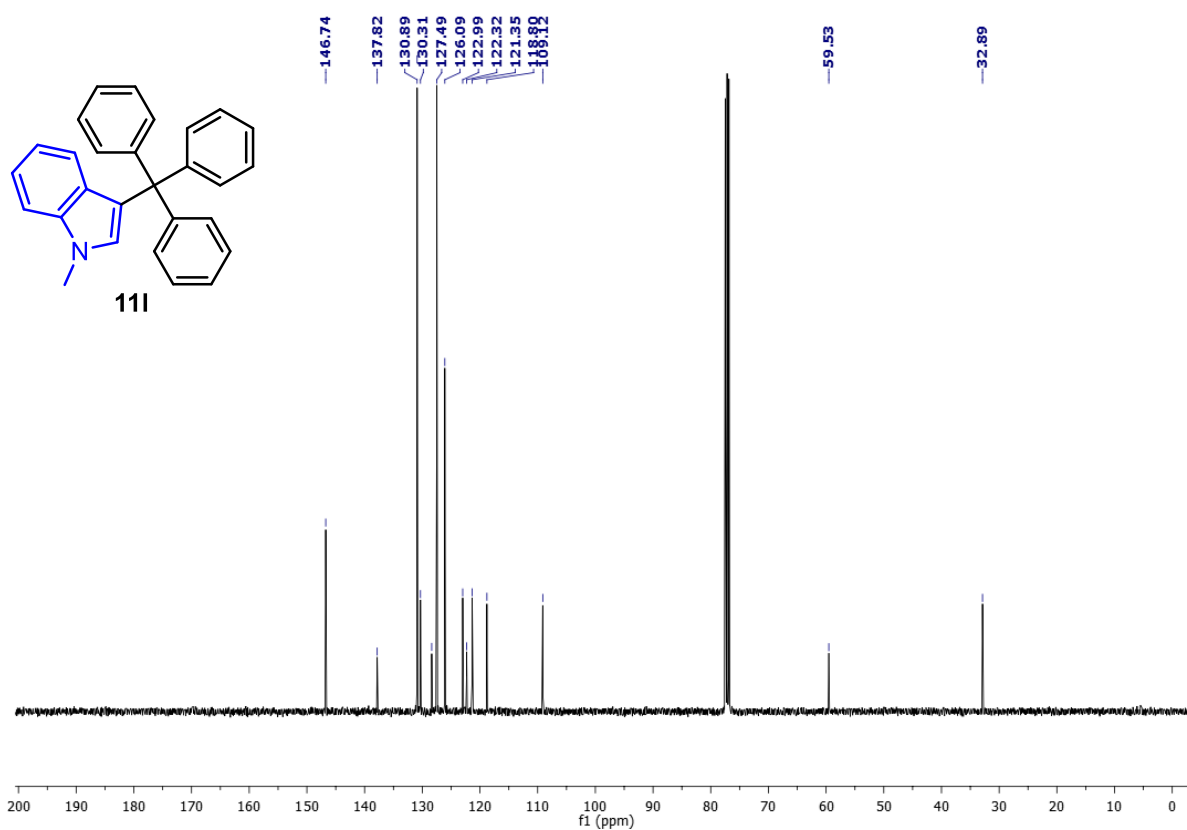

<sup>1</sup>H NMR Spectrum of **11m** (400 MHz, CDCl<sub>3</sub>)

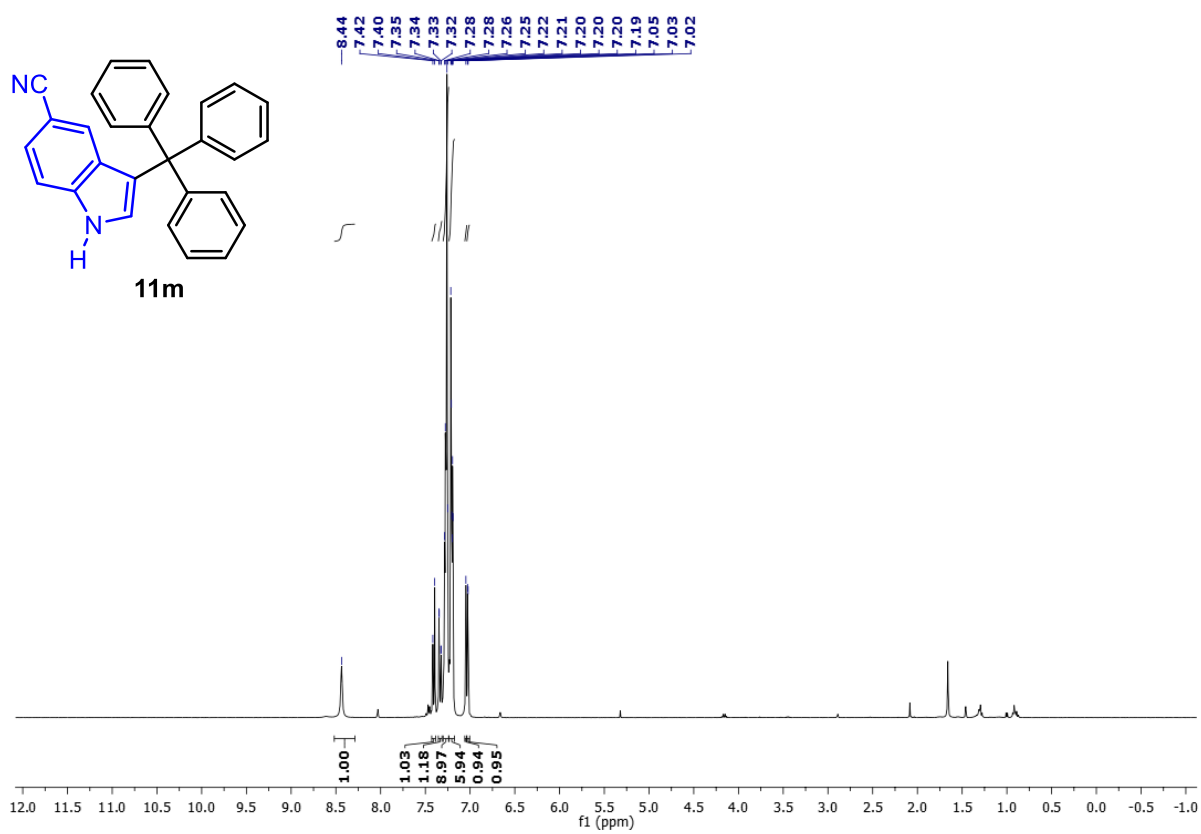

$^{13}\text{C}$  NMR Spectrum of **11m** (100 MHz,  $\text{CDCl}_3$ )

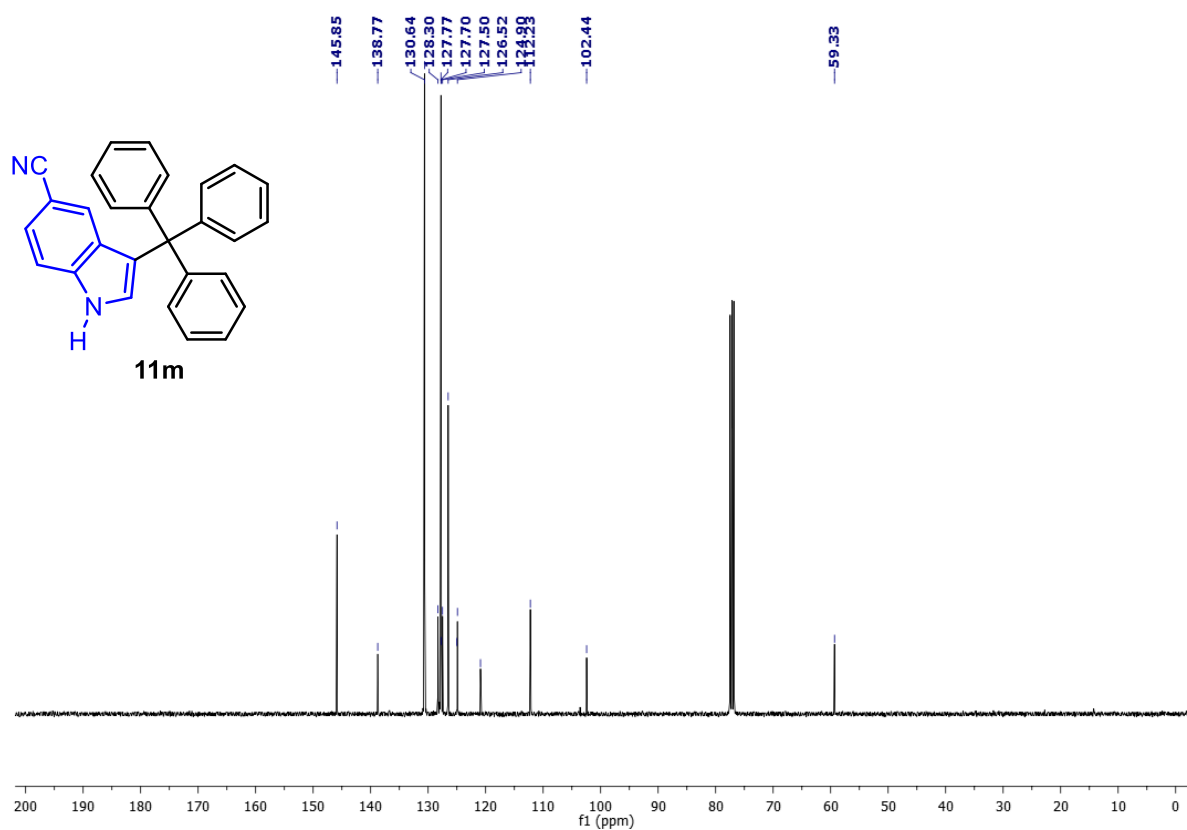

$^1\text{H}$  NMR Spectrum of **11n** (400 MHz,  $\text{CDCl}_3$ )

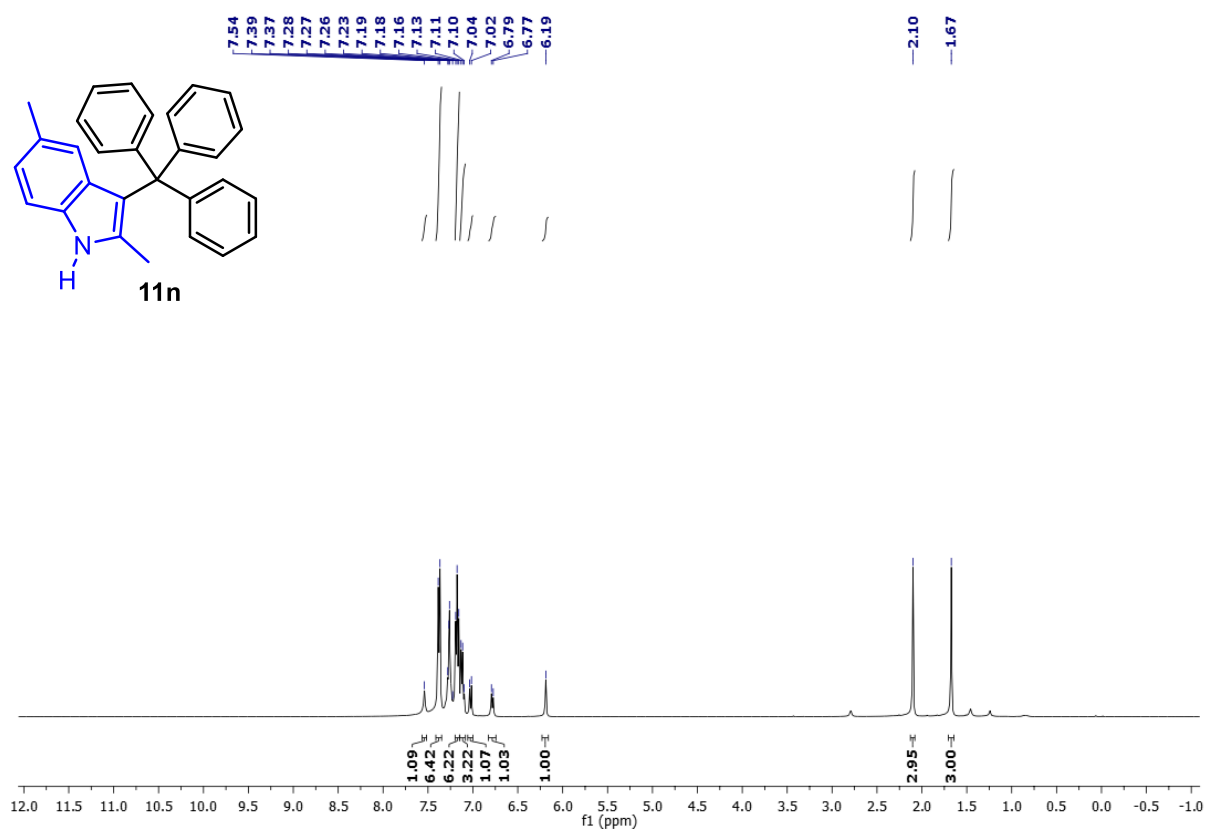

<sup>13</sup>C NMR Spectrum of **11n** (100 MHz, CDCl<sub>3</sub>)

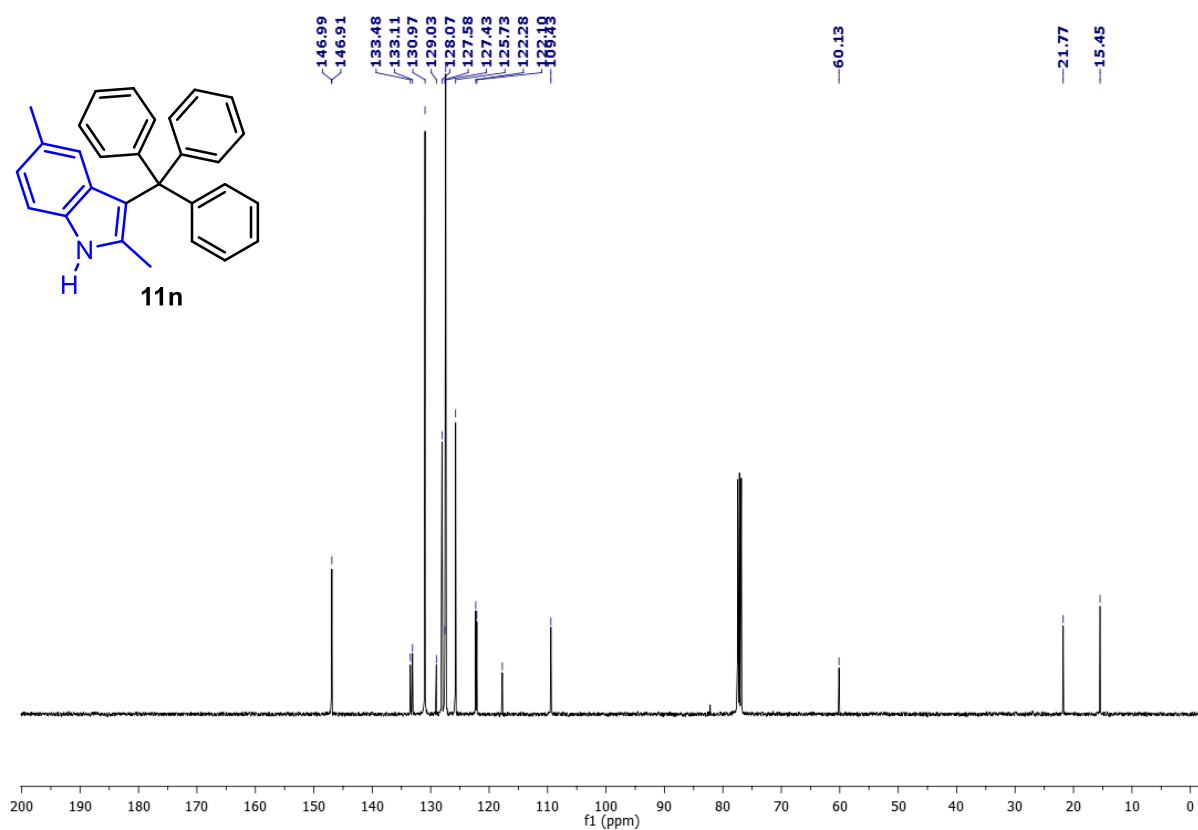

<sup>1</sup>H NMR Spectrum of **11o** (400 MHz, CDCl<sub>3</sub>)

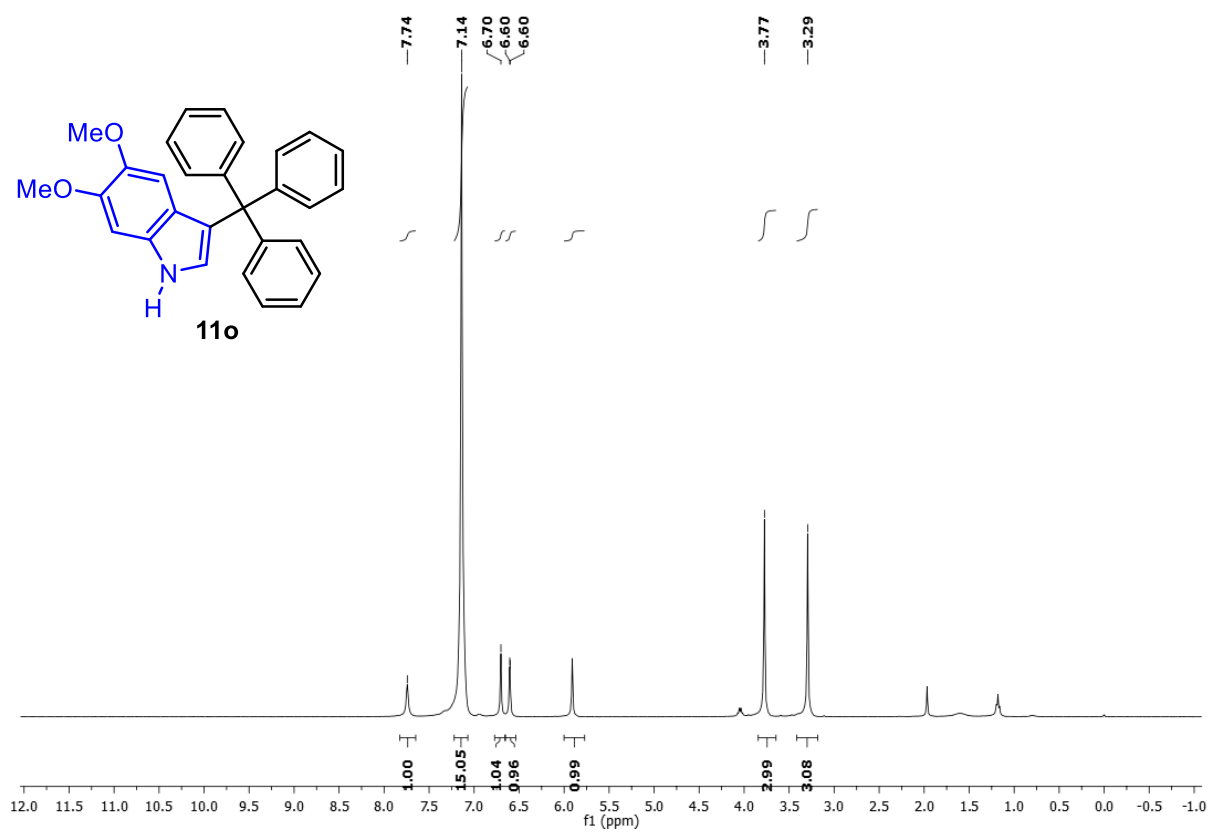

<sup>13</sup>C NMR Spectrum of **11o** (100 MHz, CDCl<sub>3</sub>)

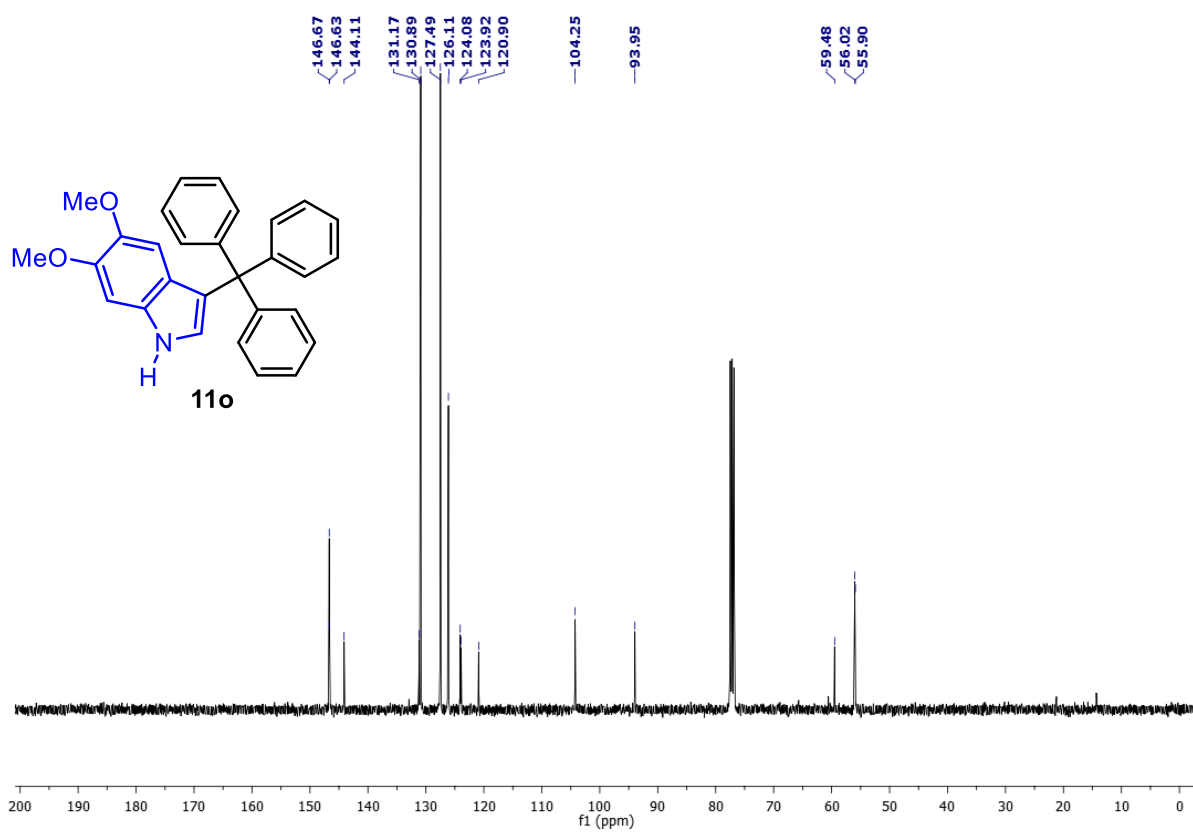

<sup>1</sup>H NMR Spectrum of **13e** (400 MHz, CDCl<sub>3</sub>)

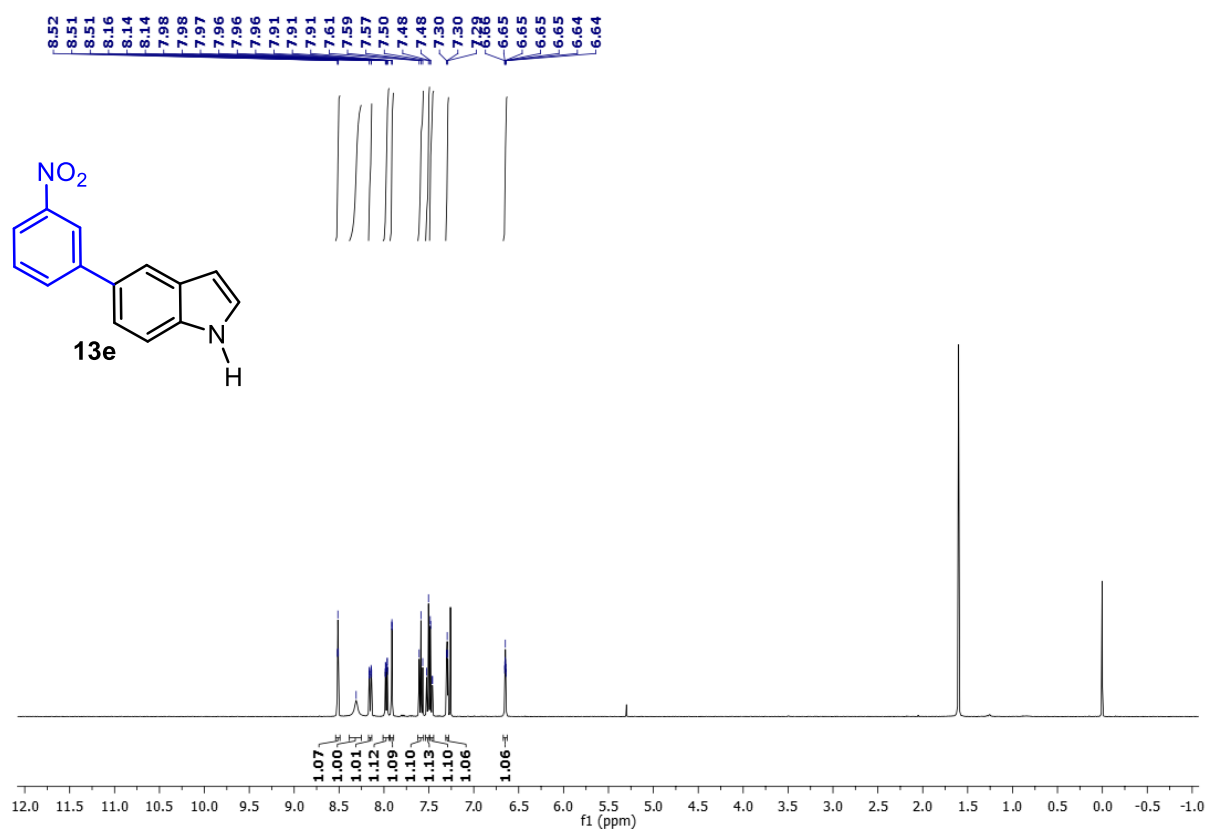

<sup>13</sup>C NMR Spectrum of **13e** (100 MHz, CDCl<sub>3</sub>)

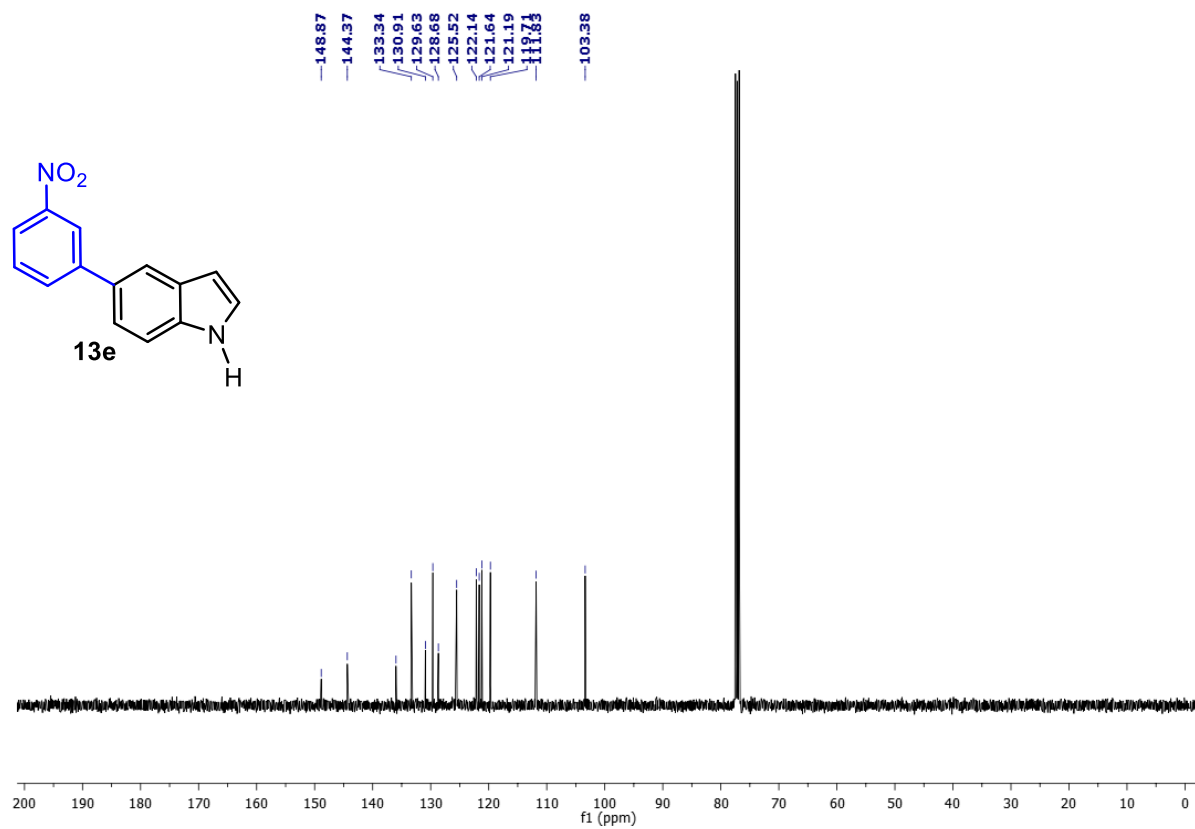

<sup>1</sup>H NMR Spectrum of **13i** (400 MHz, CDCl<sub>3</sub>)

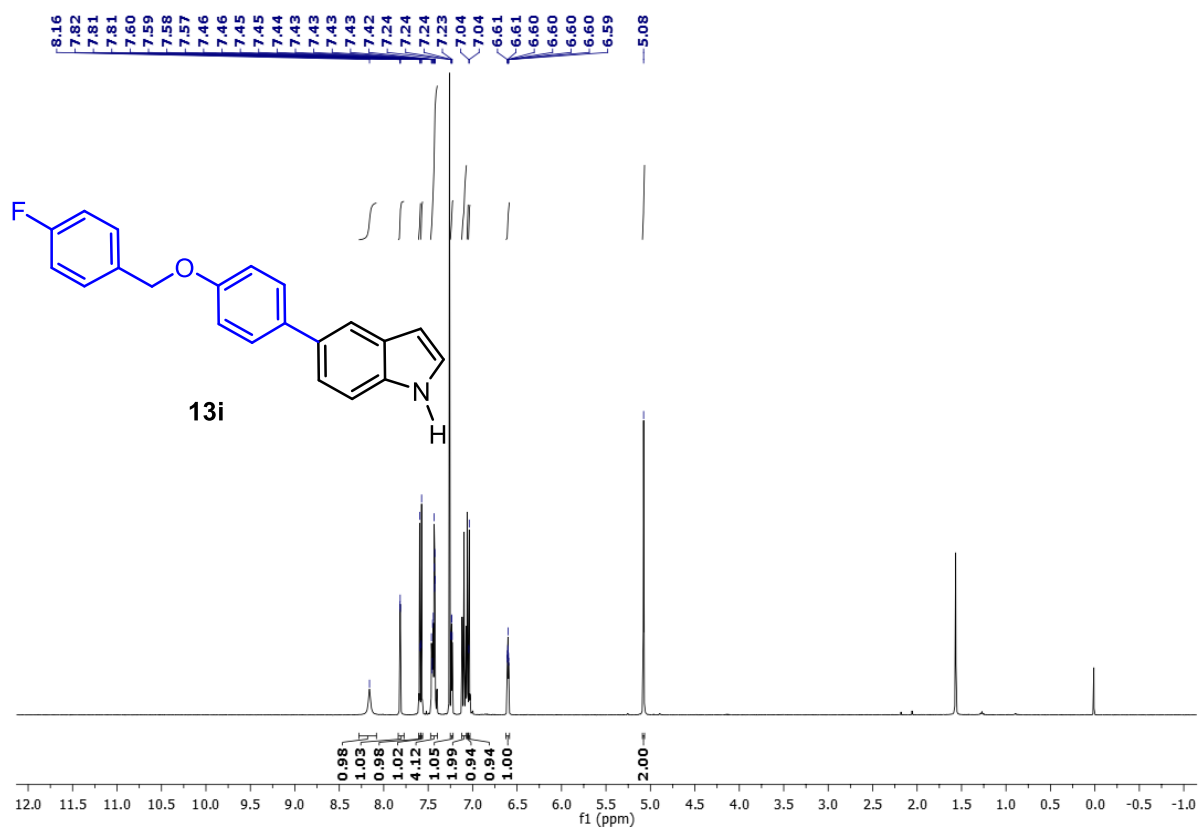

<sup>13</sup>C NMR Spectrum of **13i** (100 MHz, CDCl<sub>3</sub>)

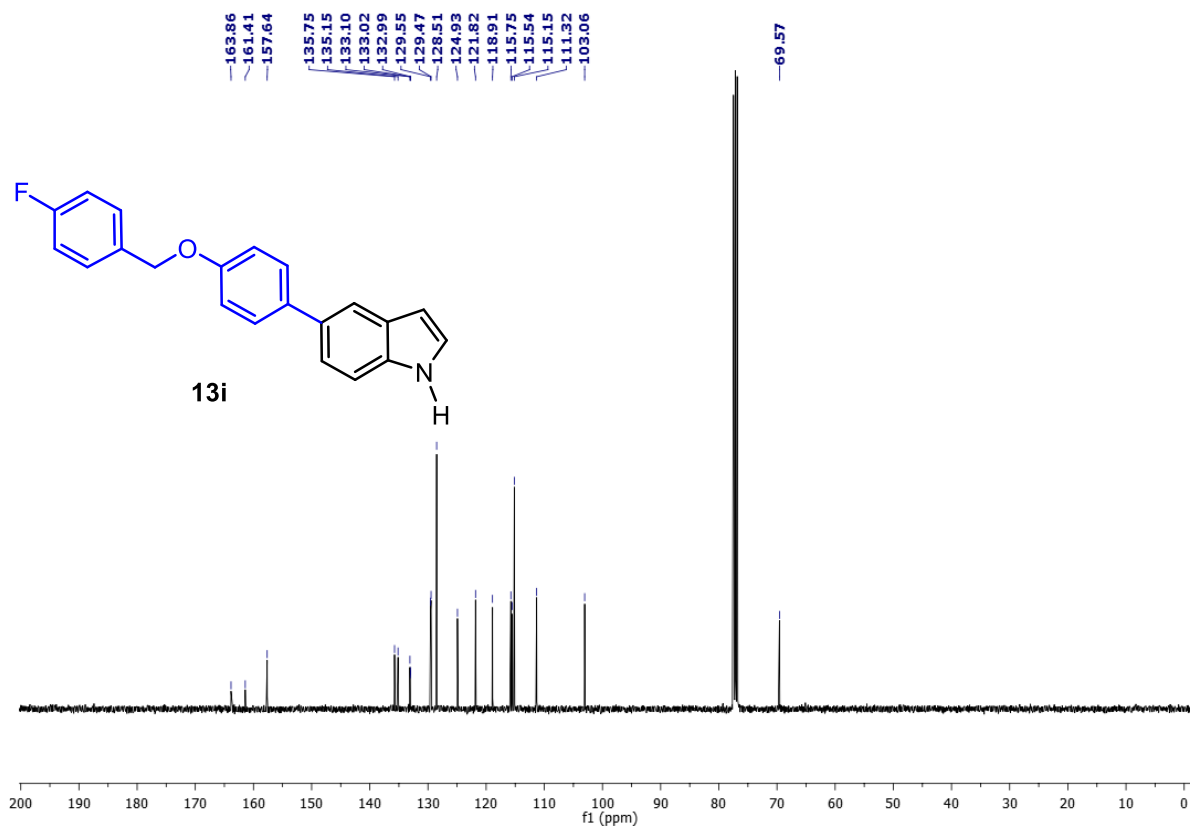

$^{19}\text{F}$  NMR Spectrum of **13i** (100 MHz,  $\text{CDCl}_3$ )

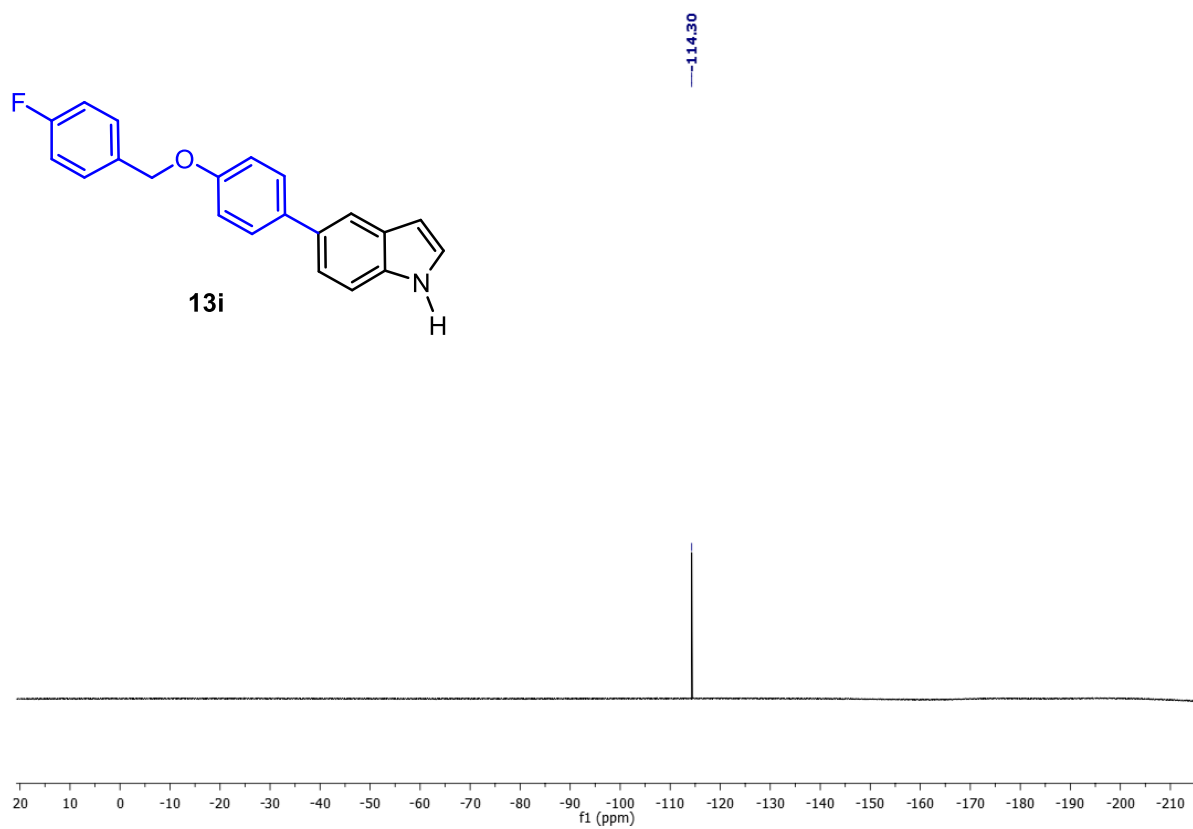

<sup>1</sup>H NMR Spectrum of **13j** (400 MHz, CDCl<sub>3</sub>)

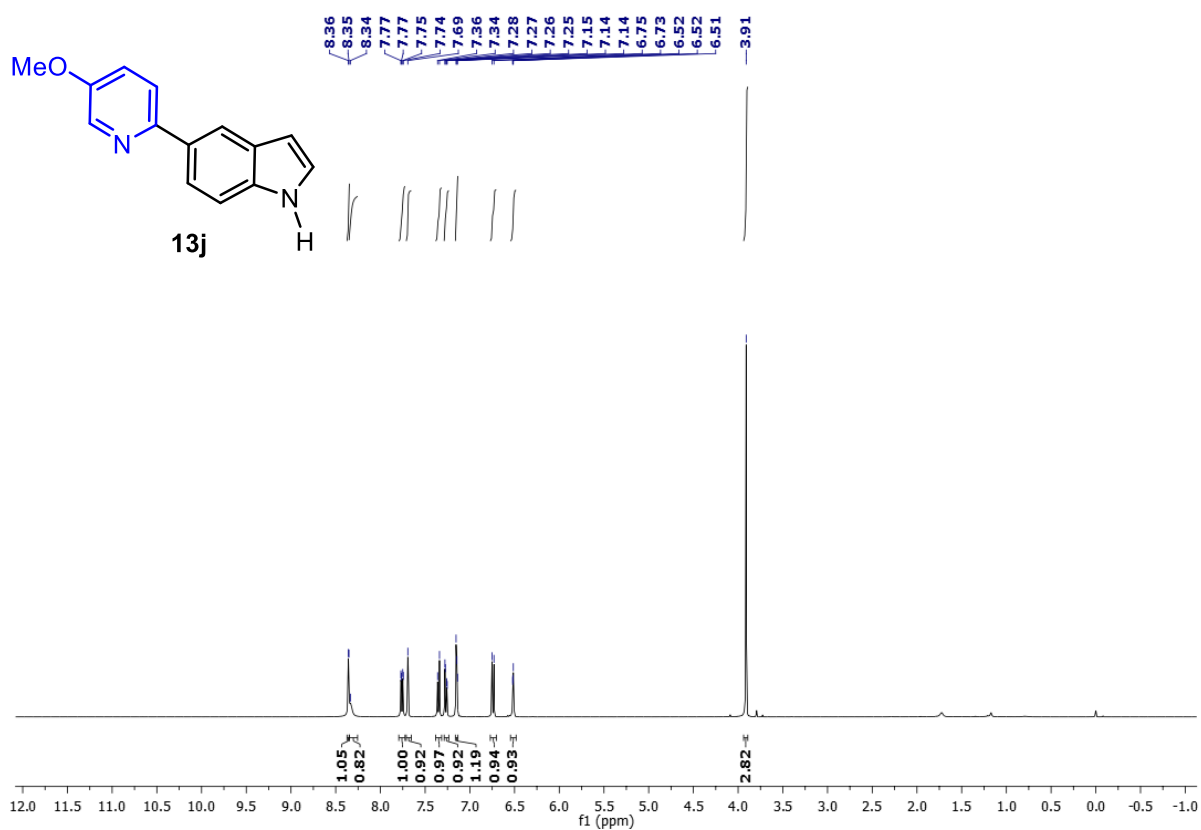

<sup>13</sup>C NMR Spectrum of **13j** (100 MHz, CDCl<sub>3</sub>)

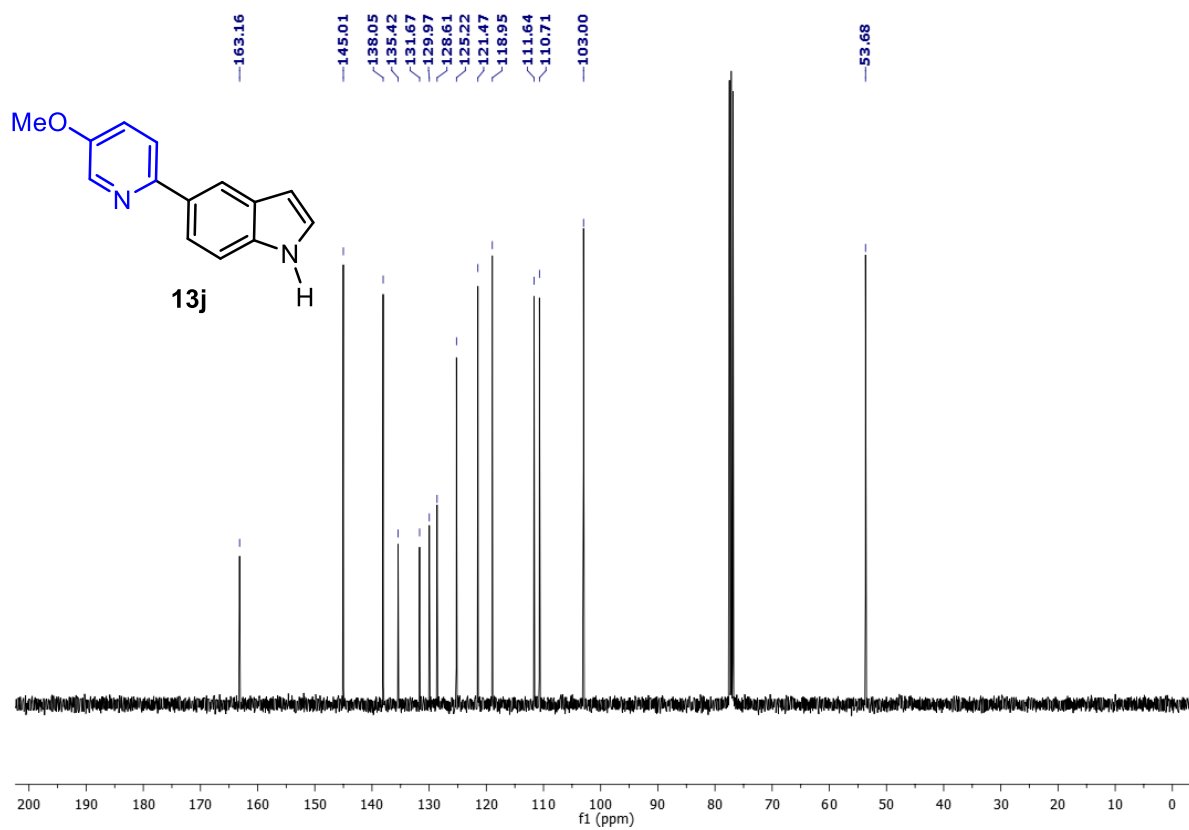

<sup>1</sup>H NMR Spectrum of **14a** (400 MHz, CDCl<sub>3</sub>)

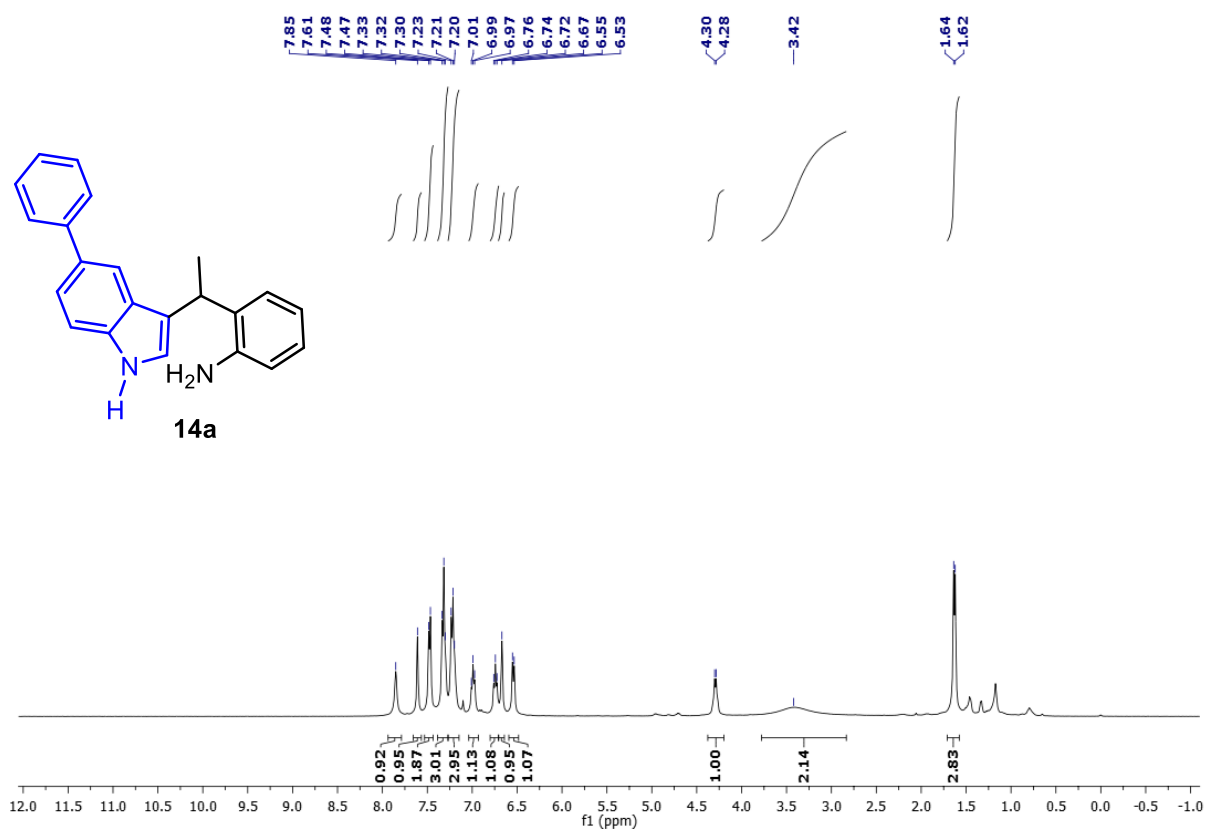

<sup>13</sup>C NMR Spectrum of **14a** (100 MHz, CDCl<sub>3</sub>)

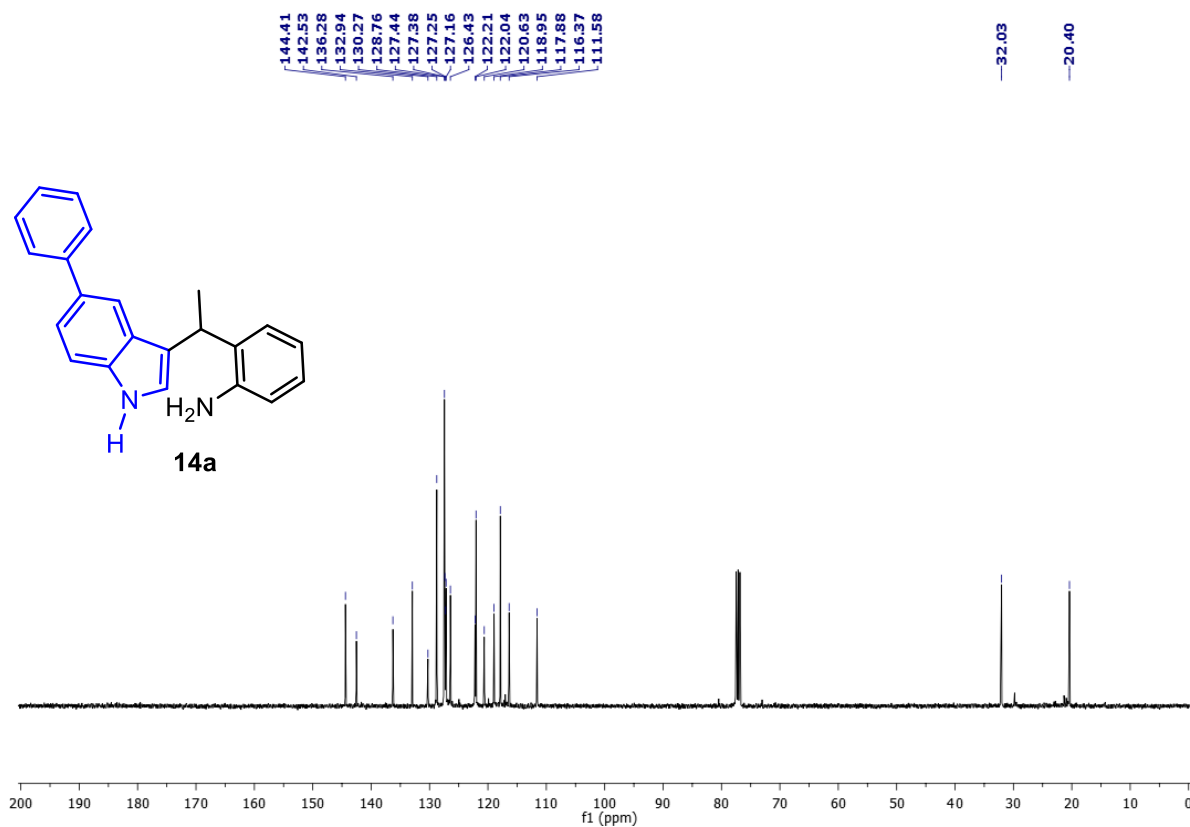

<sup>1</sup>H NMR Spectrum of **14b** (400 MHz, CDCl<sub>3</sub>)

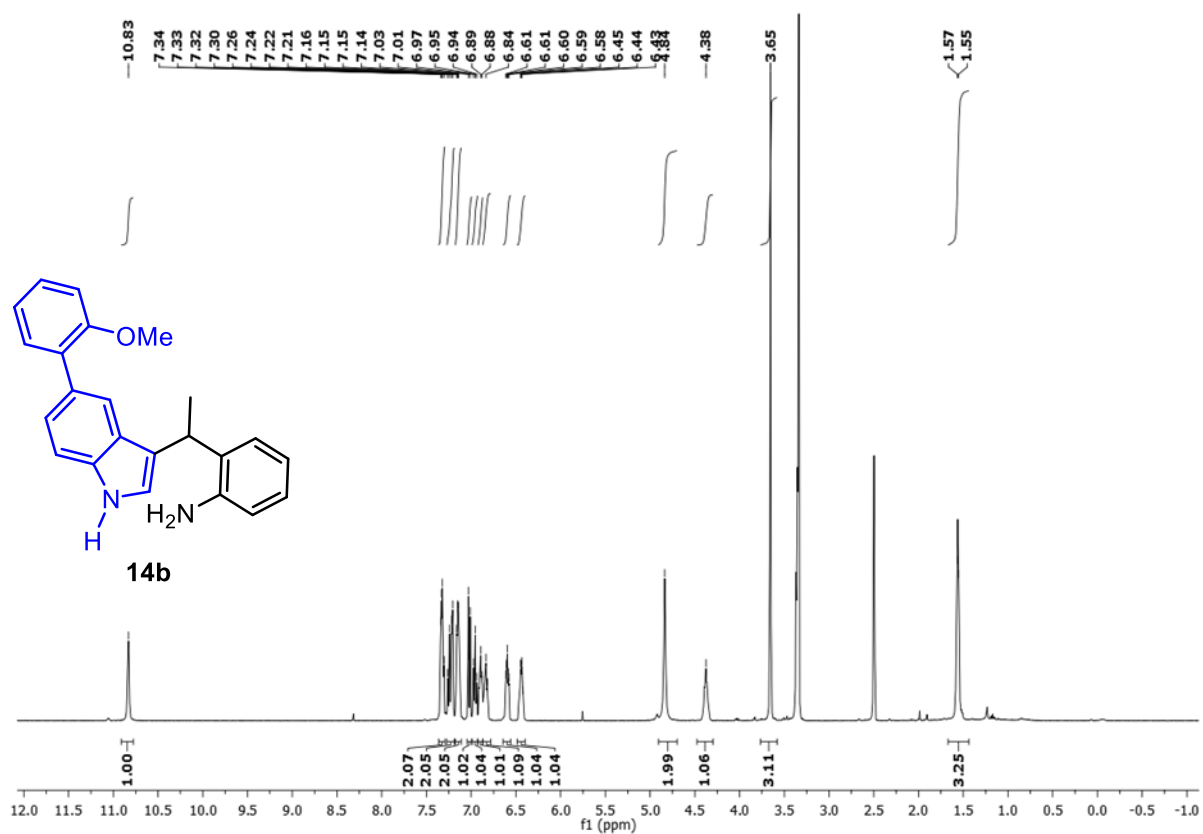

<sup>13</sup>C NMR Spectrum of **14b** (100 MHz, CDCl<sub>3</sub>)

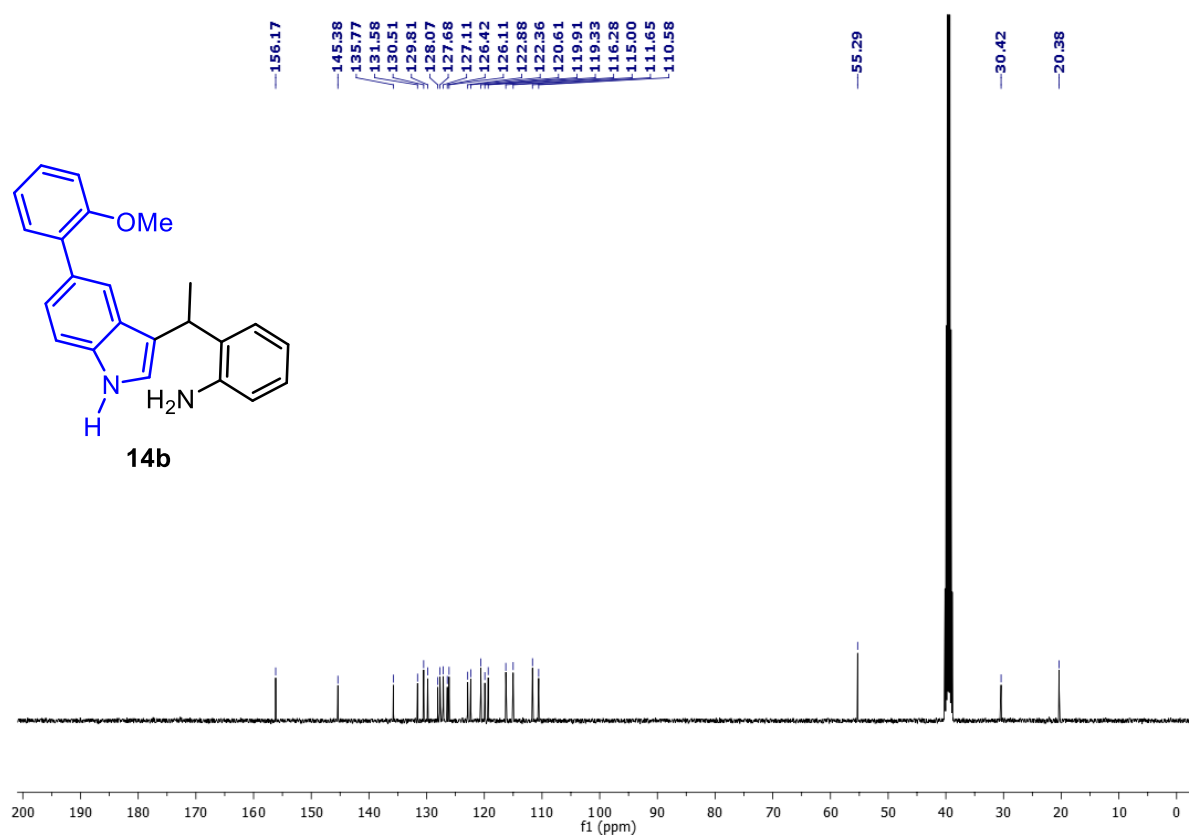

<sup>1</sup>H NMR Spectrum of **14c** (400 MHz, CDCl<sub>3</sub>)

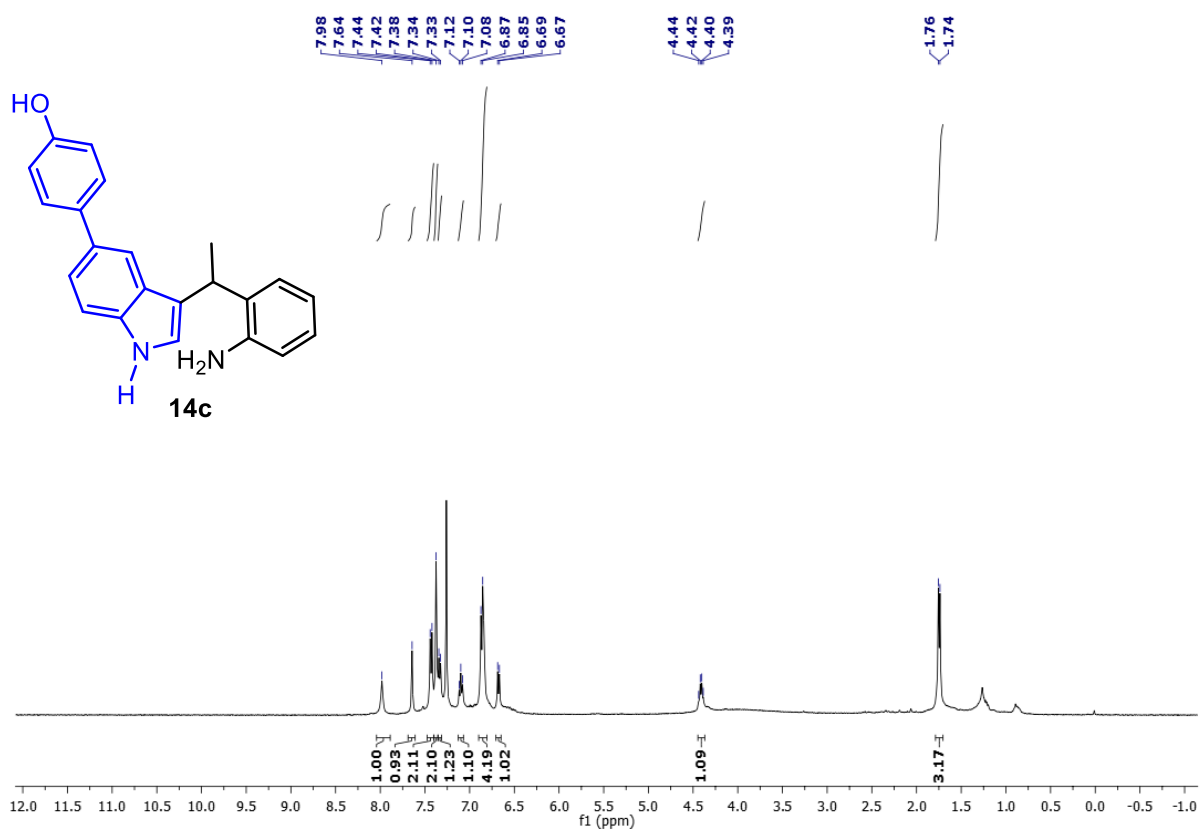

<sup>13</sup>C NMR Spectrum of **14c** (100 MHz, CDCl<sub>3</sub>)

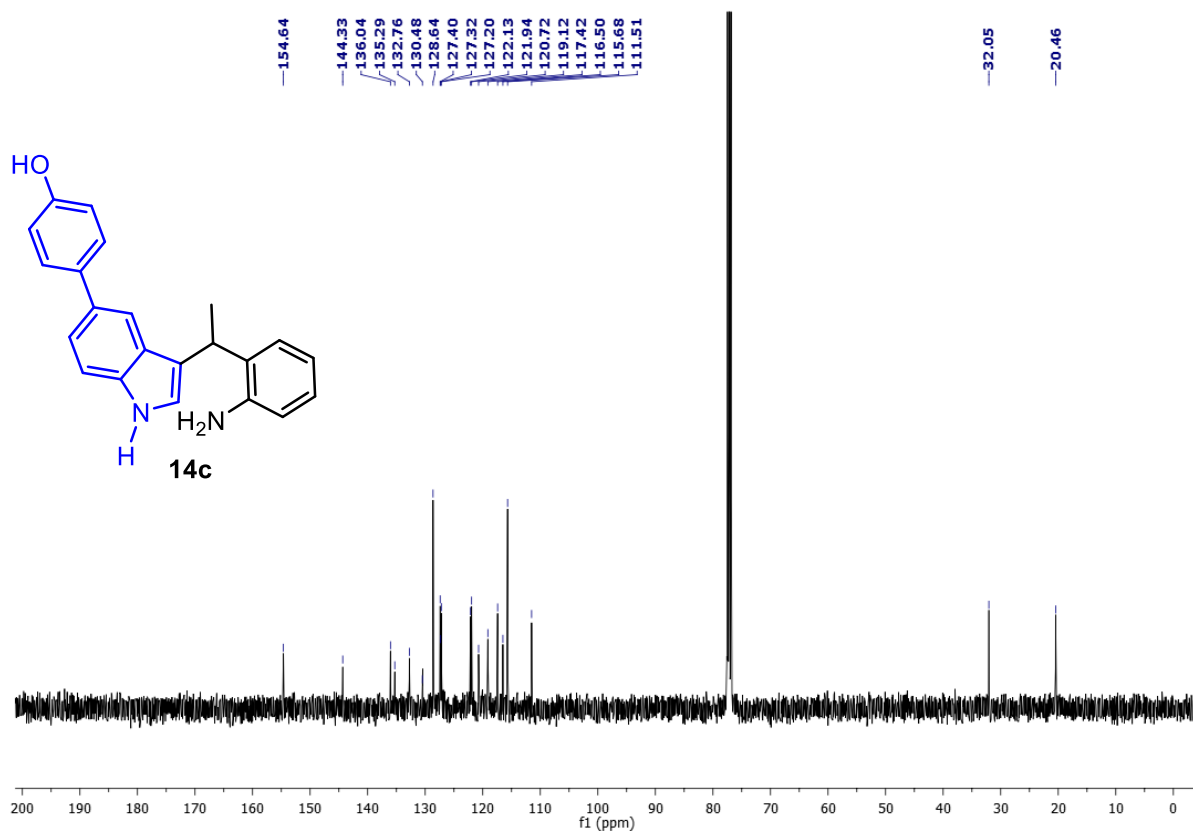

<sup>1</sup>H NMR Spectrum of **14d** (400 MHz, CDCl<sub>3</sub>)

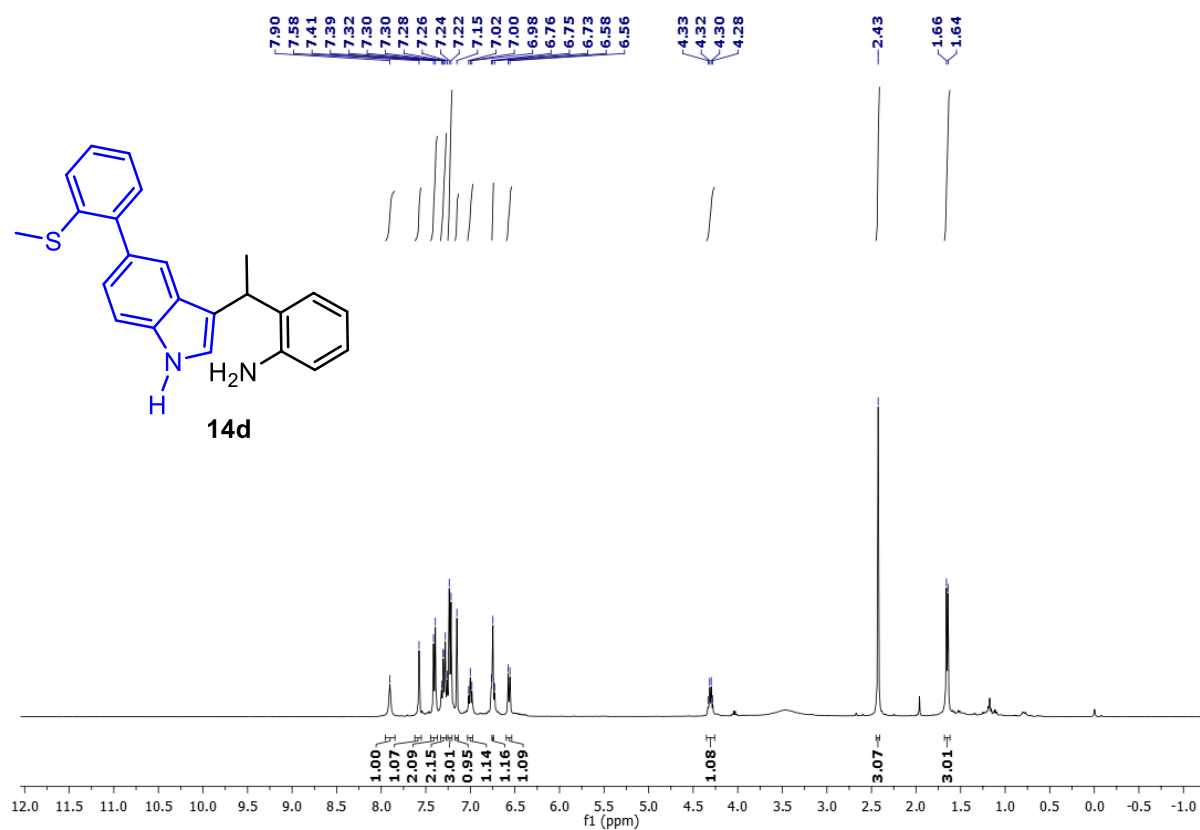

<sup>13</sup>C NMR Spectrum of **14d** (100 MHz, CDCl<sub>3</sub>)

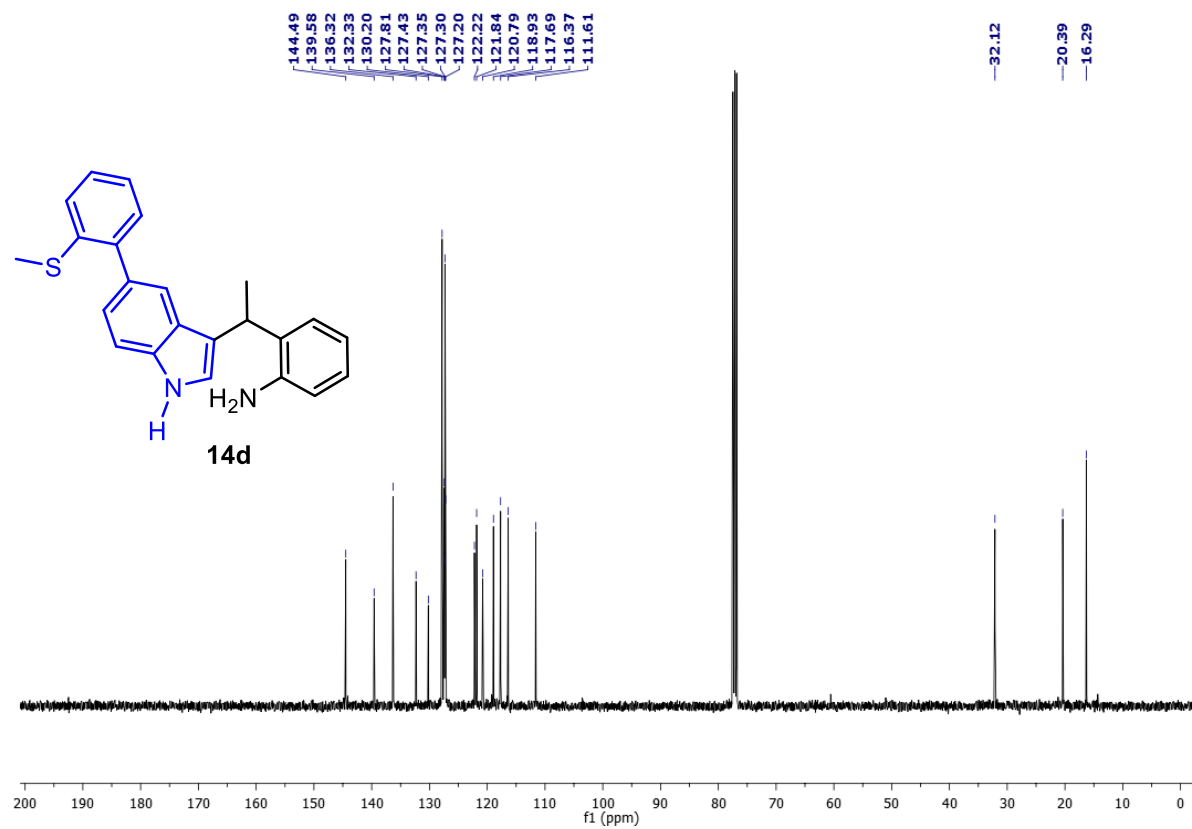

<sup>1</sup>H NMR Spectrum of **14e** (400 MHz, CDCl<sub>3</sub>)

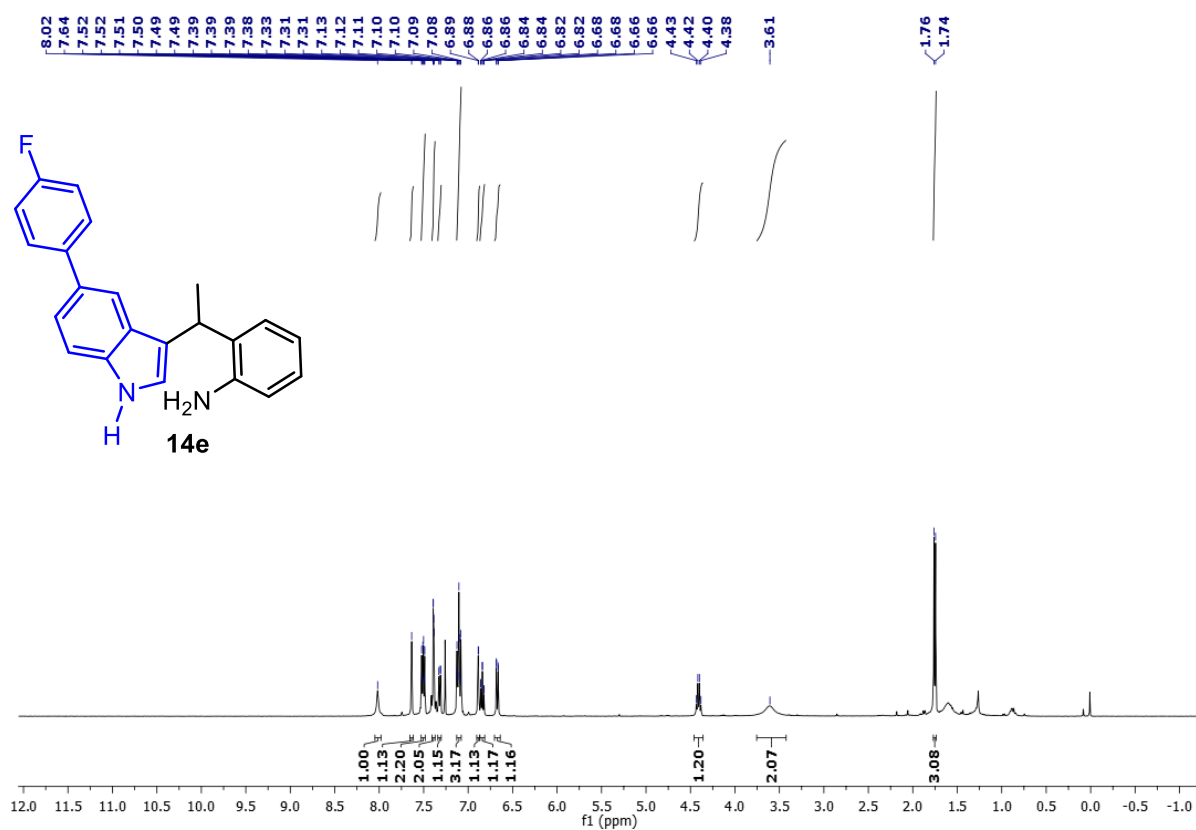

<sup>13</sup>C NMR Spectrum of **14e** (100 MHz, CDCl<sub>3</sub>)

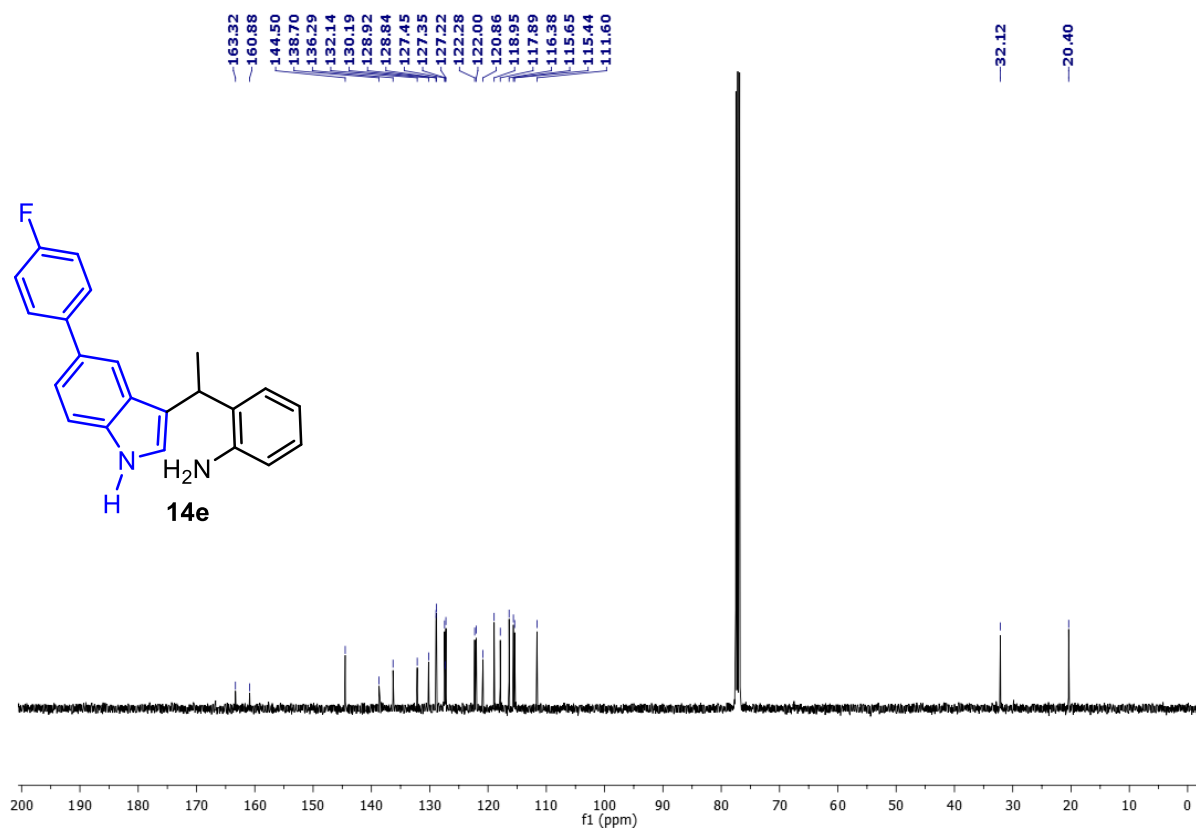

$^{19}\text{F}$  NMR Spectrum of **14e** (100 MHz,  $\text{CDCl}_3$ )

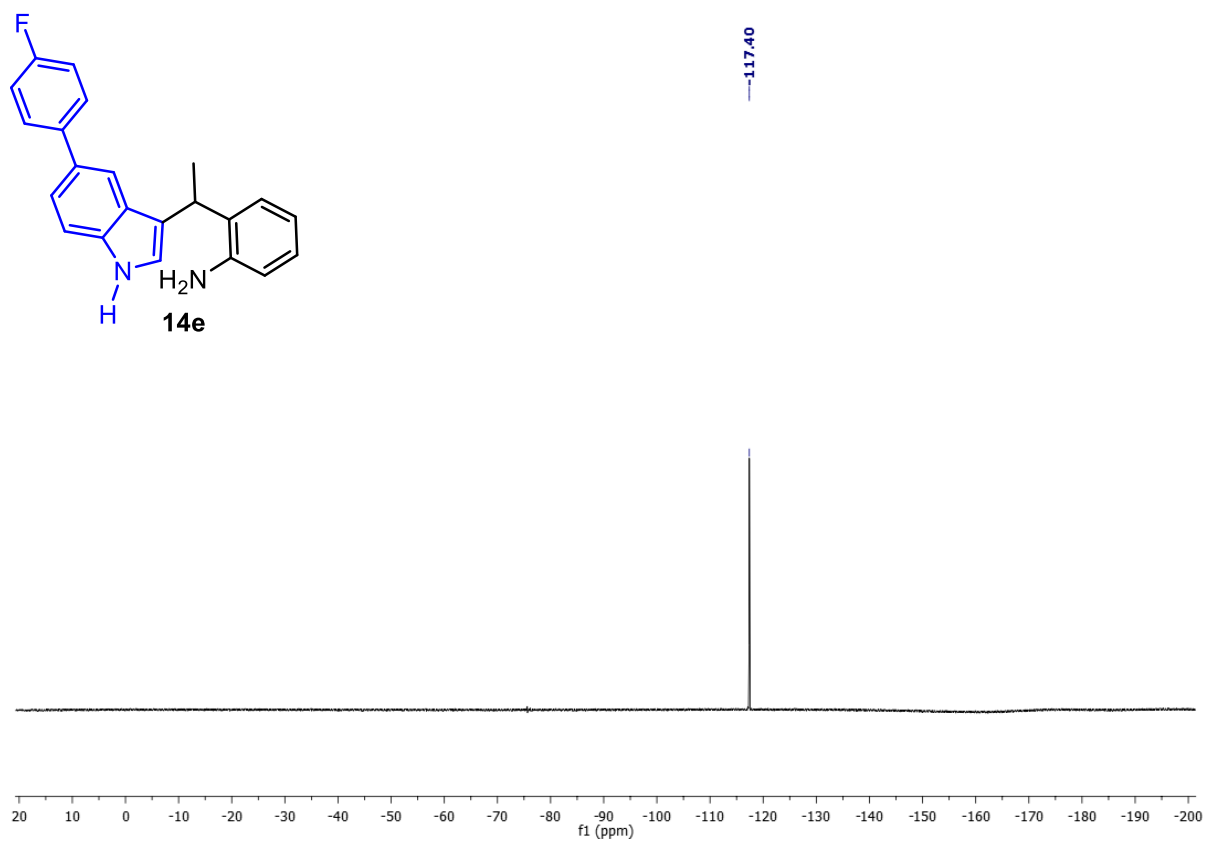

<sup>1</sup>H NMR Spectrum of **14f** (400 MHz, CDCl<sub>3</sub>)

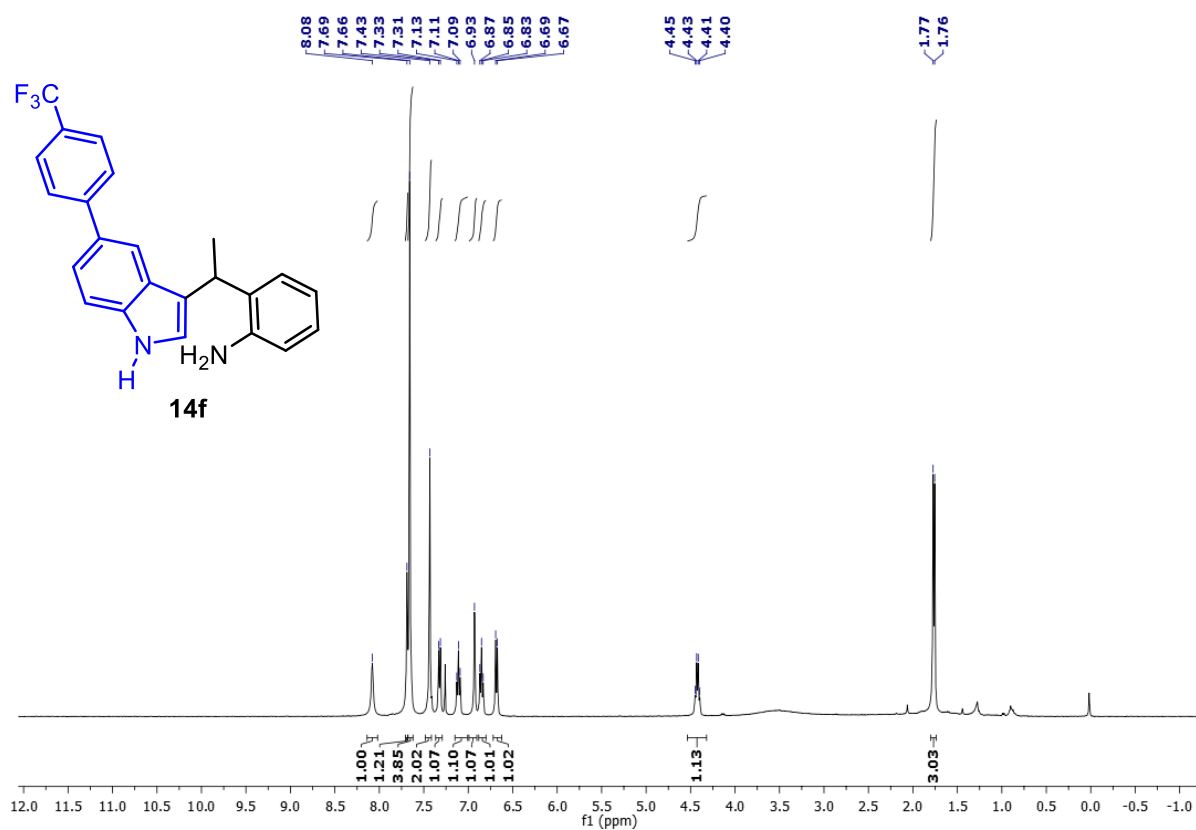

<sup>13</sup>C NMR Spectrum of **14f** (100 MHz, CDCl<sub>3</sub>)

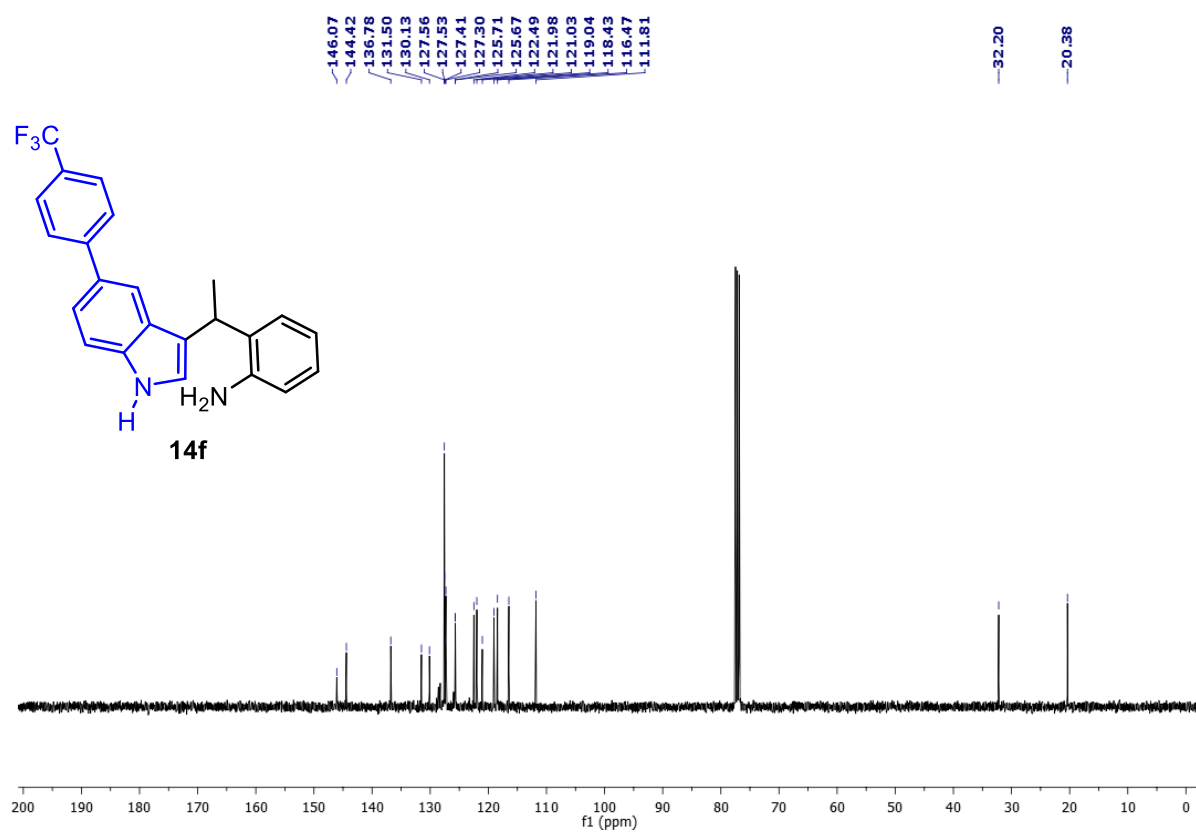

$^{19}\text{F}$  NMR Spectrum of **14f** (100 MHz,  $\text{CDCl}_3$ )

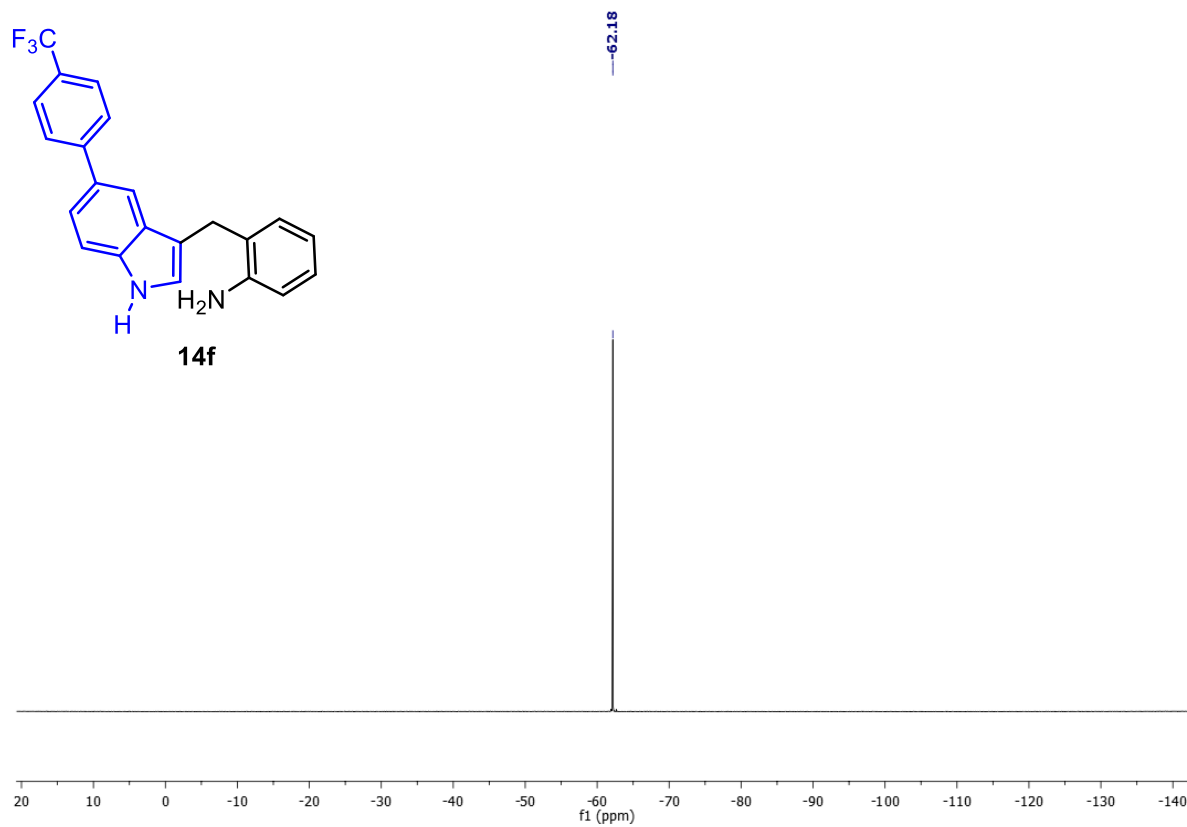

<sup>1</sup>H NMR Spectrum of **14g** (400 MHz, CDCl<sub>3</sub>)

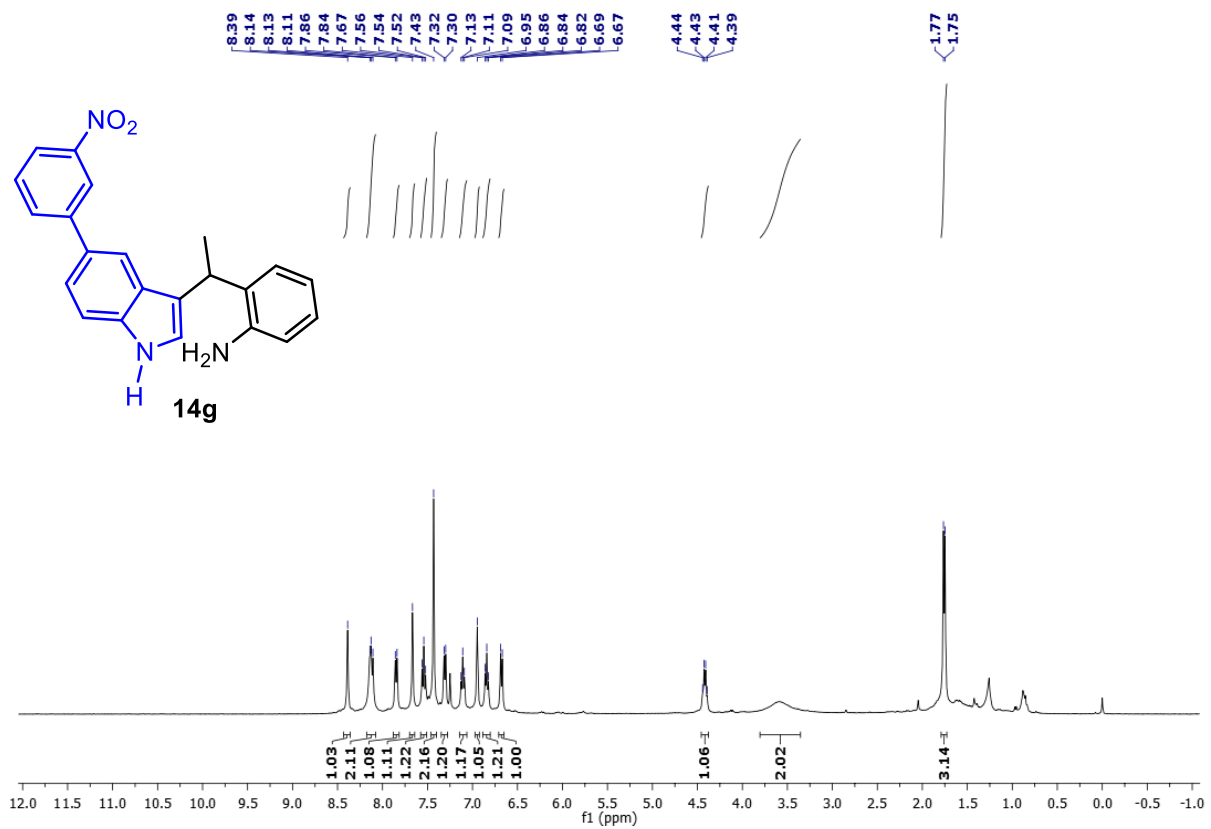

<sup>13</sup>C NMR Spectrum of **14g** (100 MHz, CDCl<sub>3</sub>)

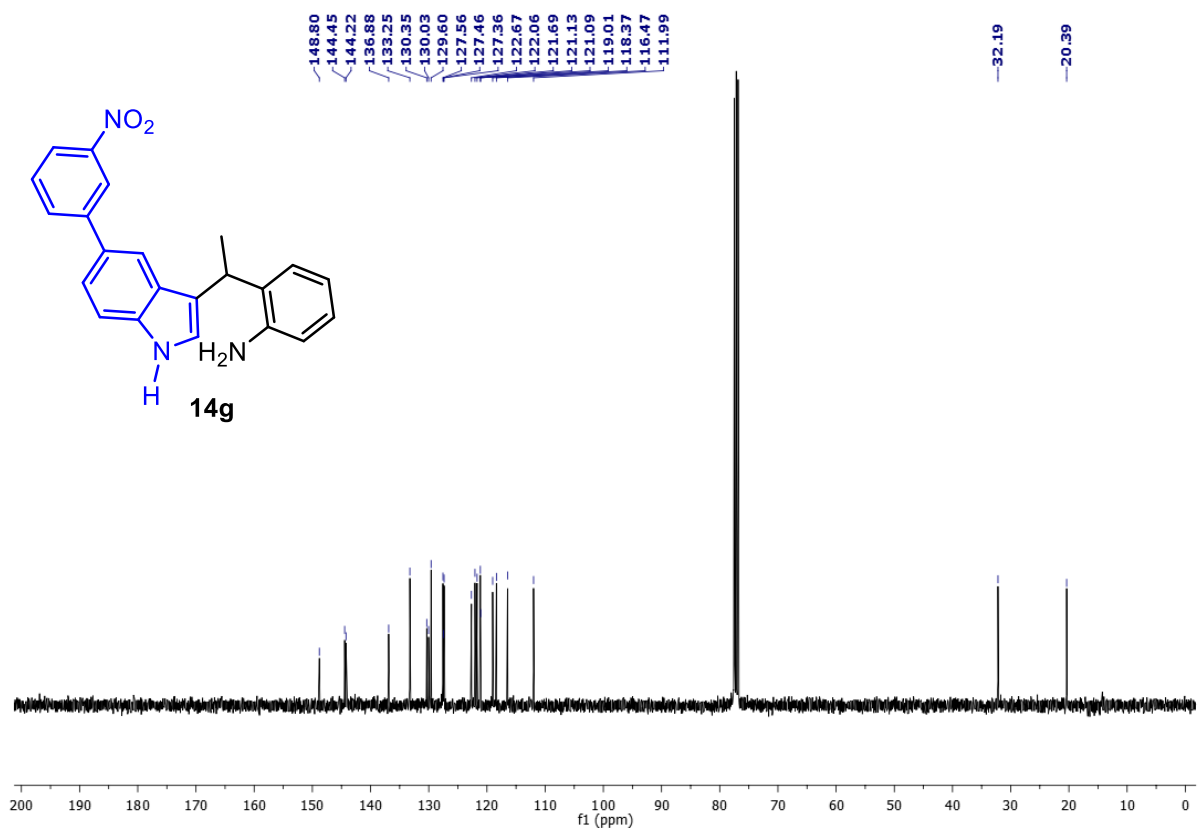

<sup>1</sup>H NMR Spectrum of **14h** (400 MHz, CDCl<sub>3</sub>)

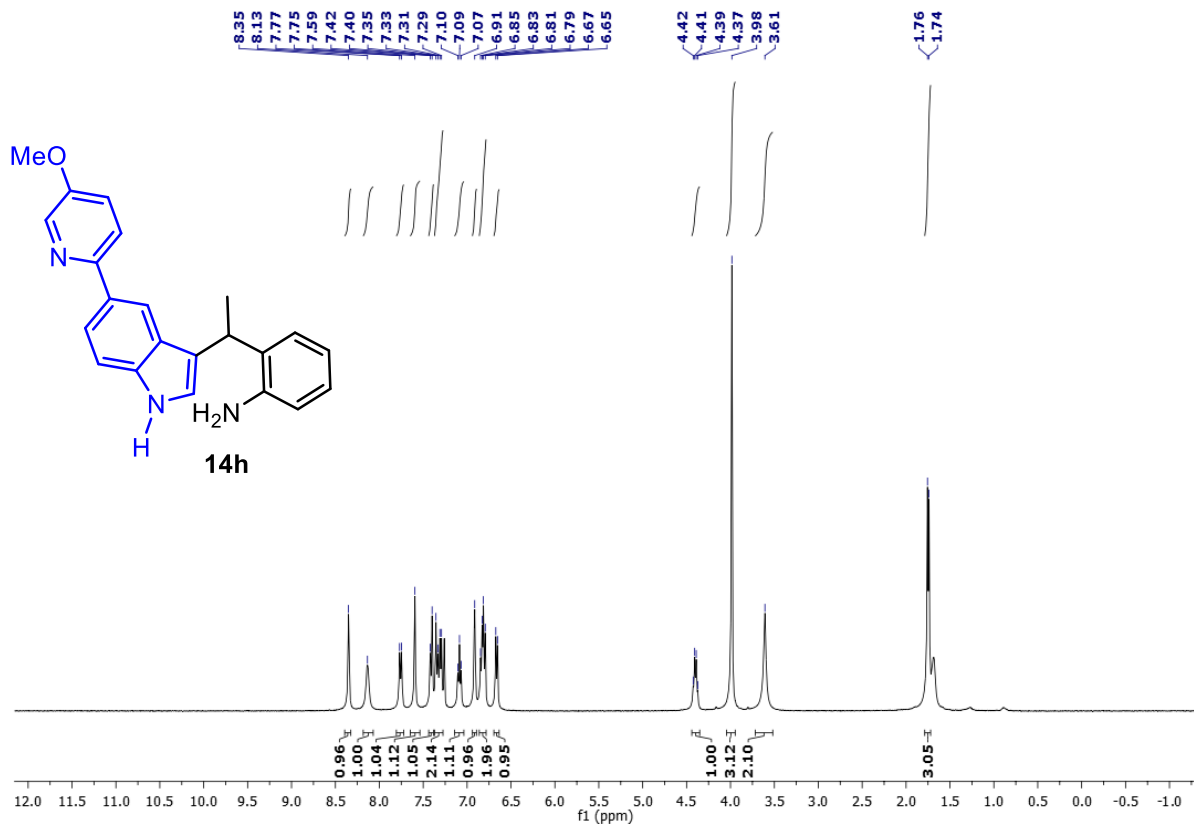

<sup>13</sup>C NMR Spectrum of **14h** (100 MHz, CDCl<sub>3</sub>)

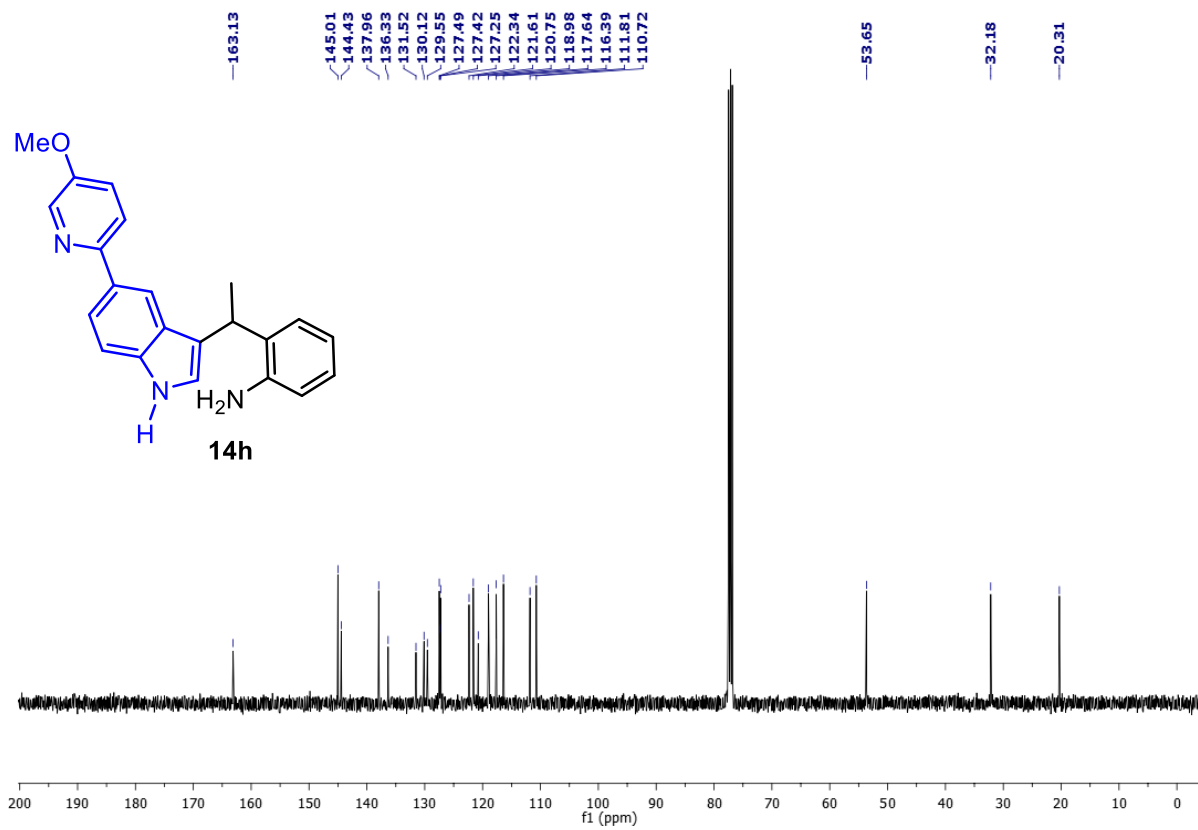

<sup>1</sup>H NMR Spectrum of **14i** (400 MHz, CDCl<sub>3</sub>)

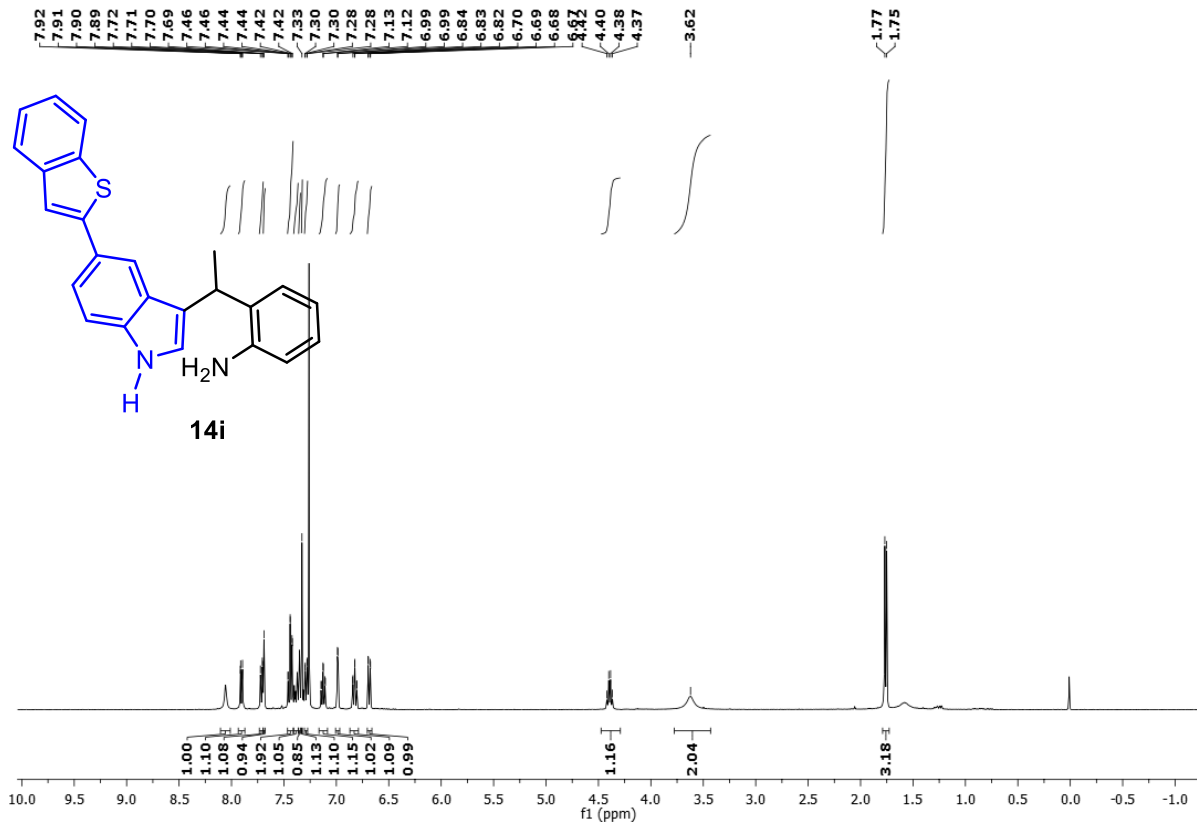

<sup>13</sup>C NMR Spectrum of **14i** (100 MHz, CDCl<sub>3</sub>)

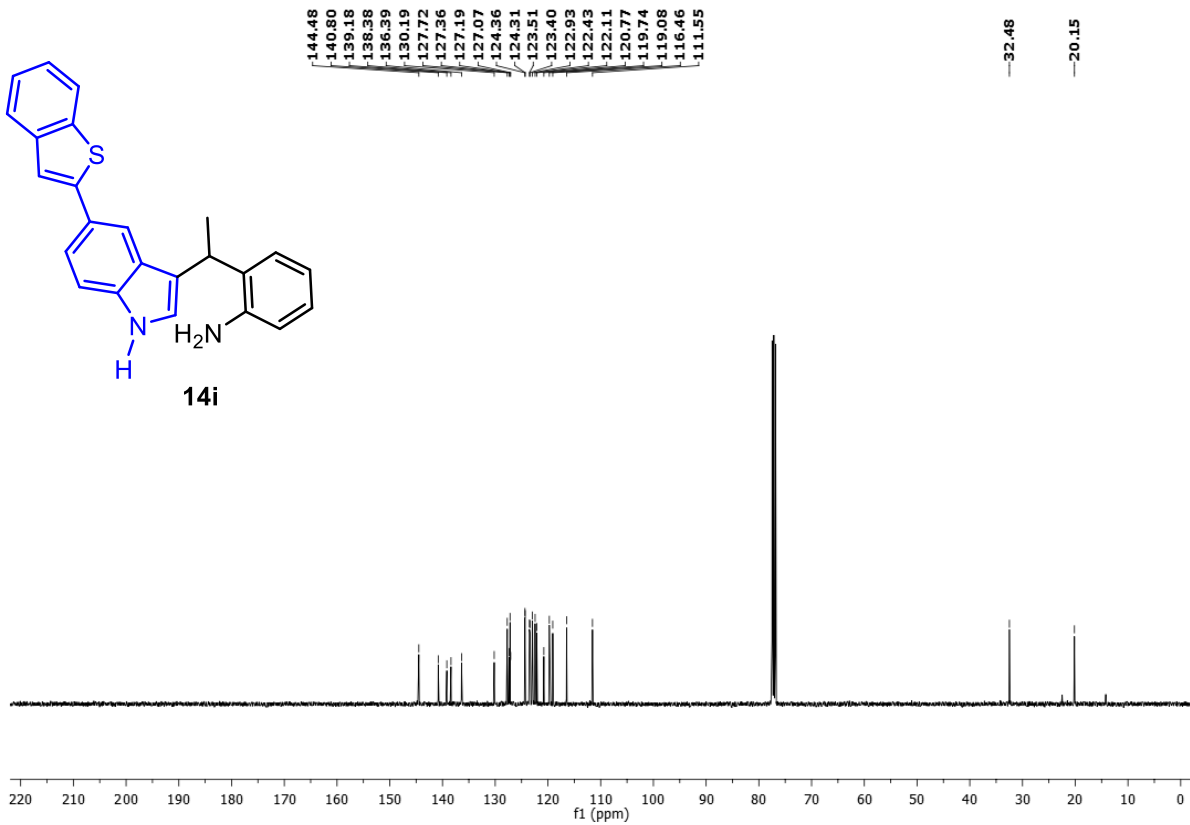

<sup>1</sup>H NMR Spectrum of **14j** (400 MHz, CDCl<sub>3</sub>)

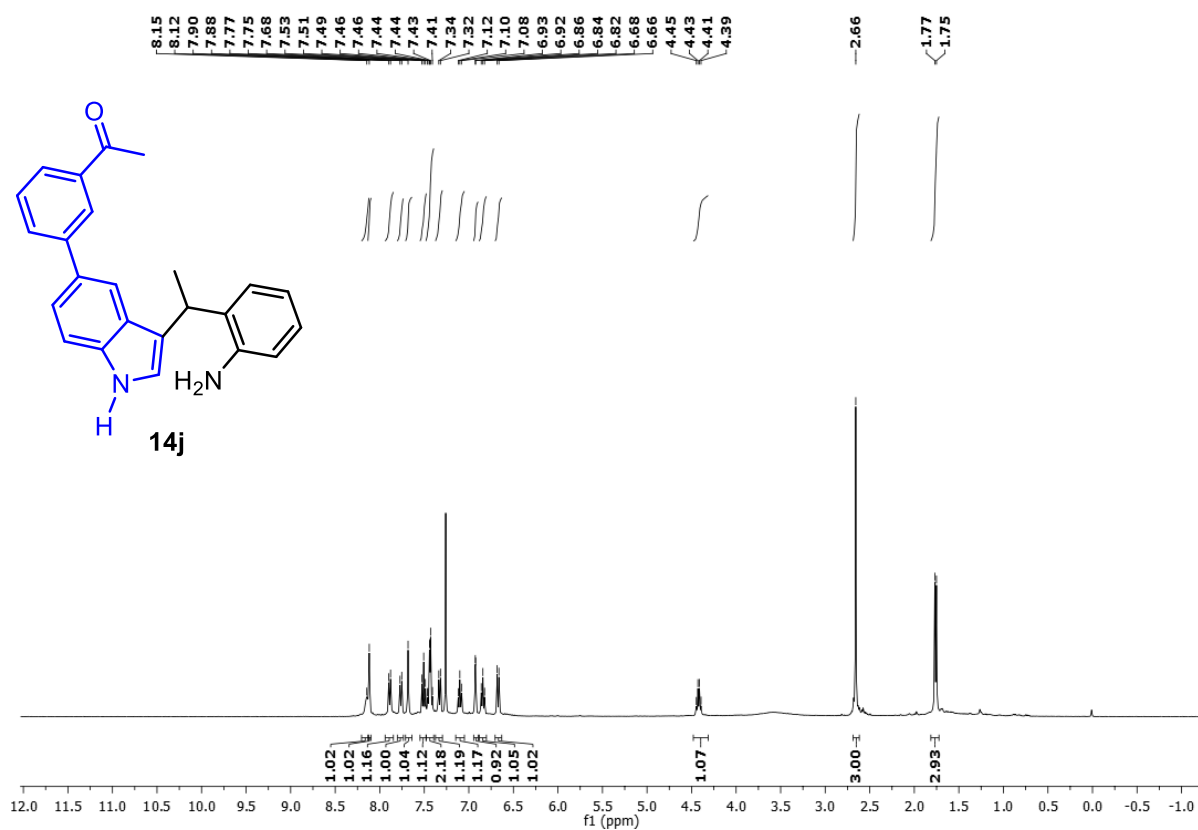

<sup>13</sup>C NMR Spectrum of **14j** (100 MHz, CDCl<sub>3</sub>)

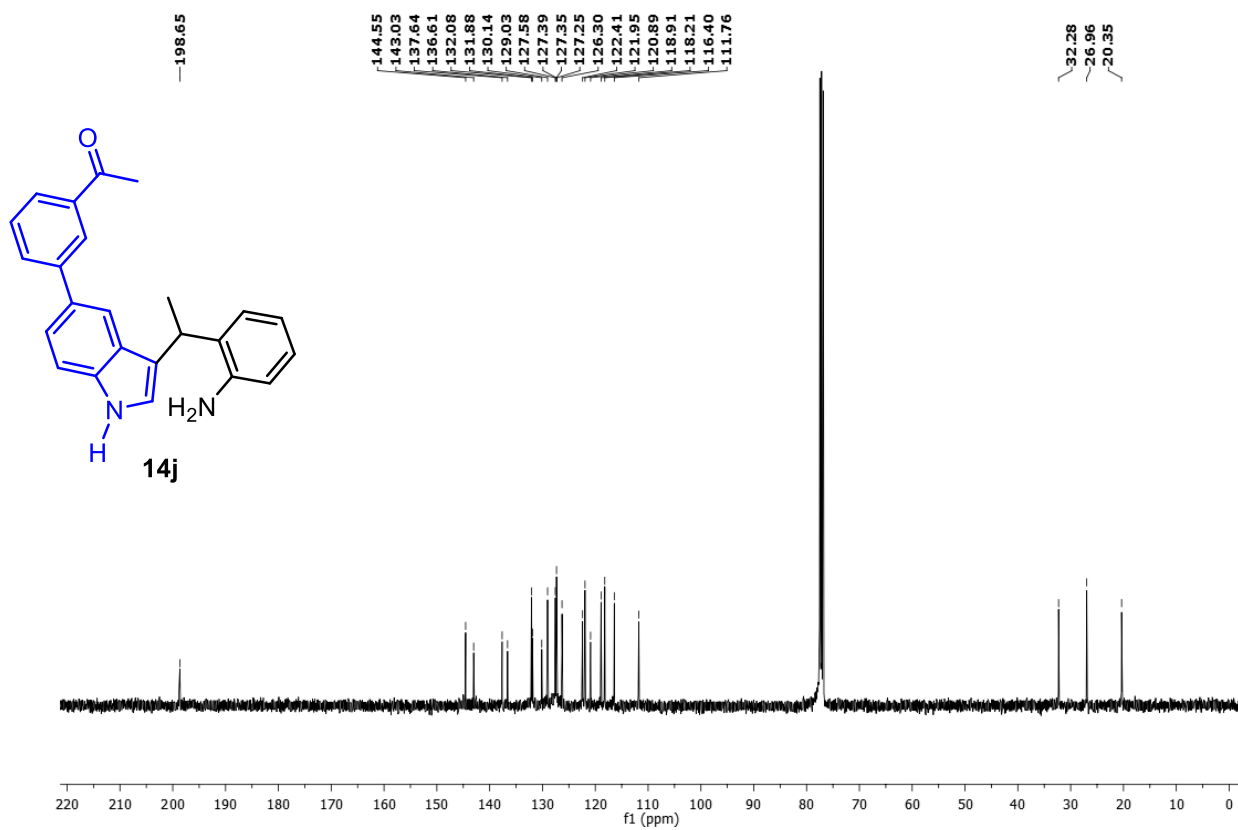

<sup>1</sup>H NMR Spectrum of **14k** (400 MHz, CDCl<sub>3</sub>)

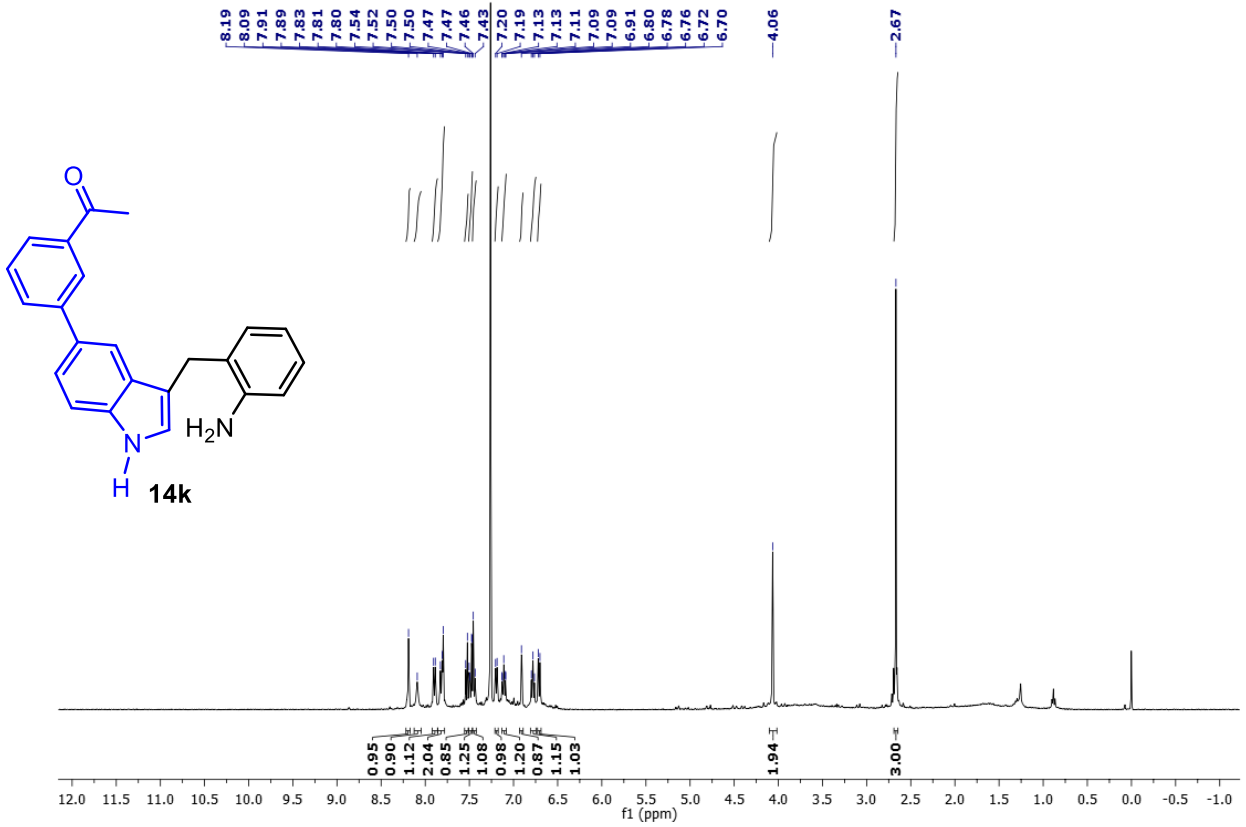

<sup>13</sup>C NMR Spectrum of **14k** (100 MHz, CDCl<sub>3</sub>)

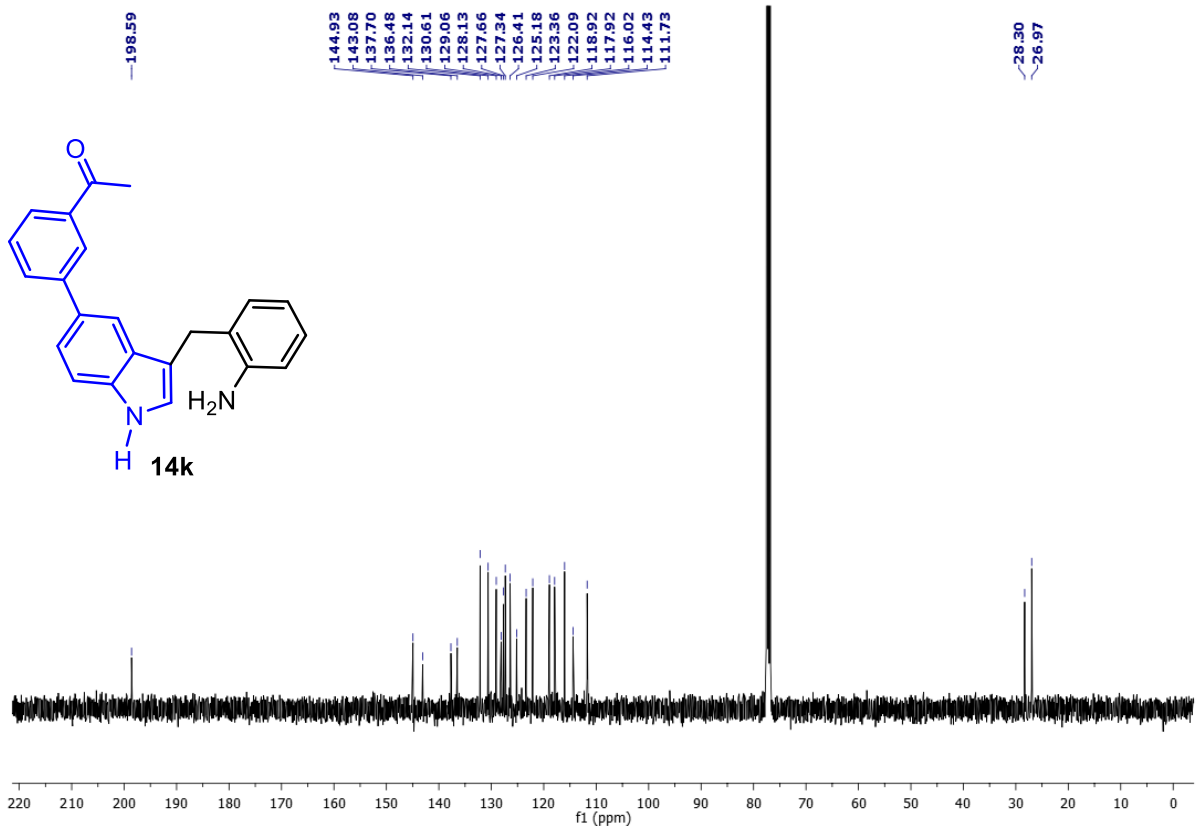

<sup>1</sup>H NMR Spectrum of **14l** (400 MHz, DMSO-d<sub>6</sub>)

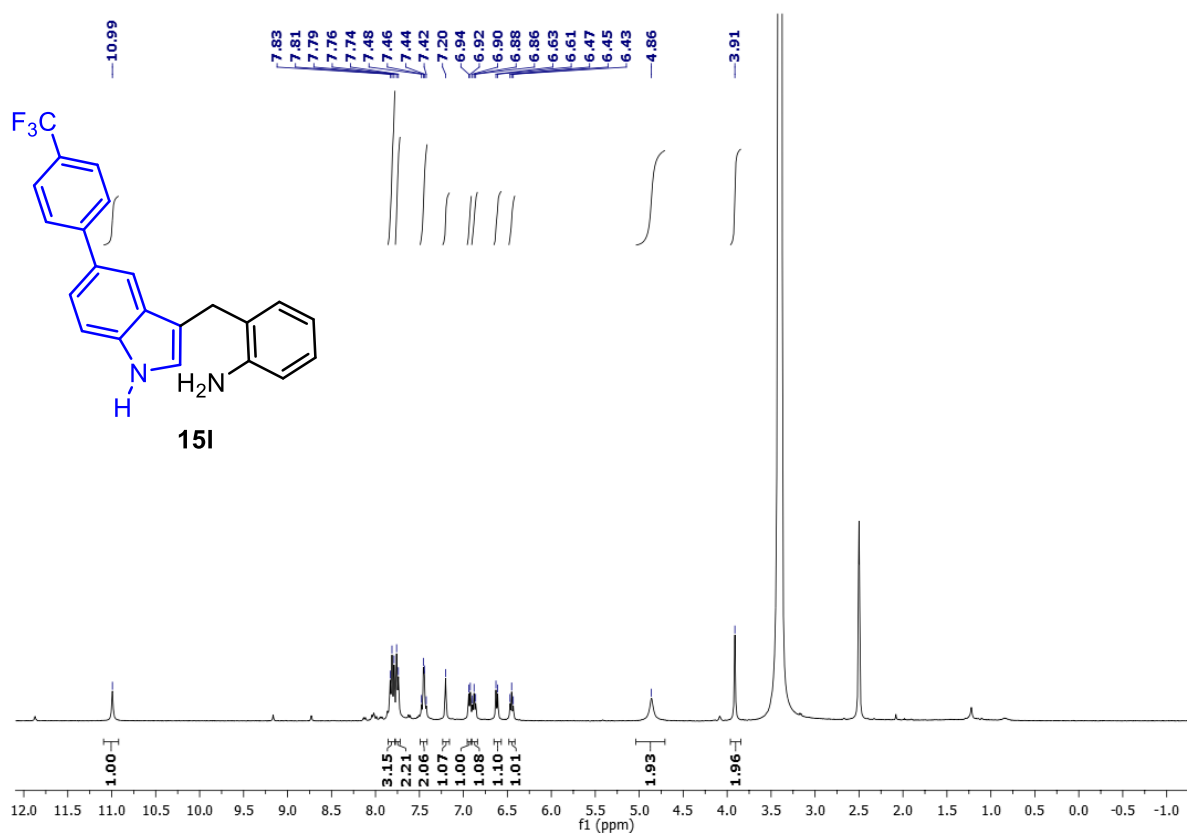

<sup>13</sup>C NMR Spectrum of **14l** (100 MHz, DMSO-d<sub>6</sub>)

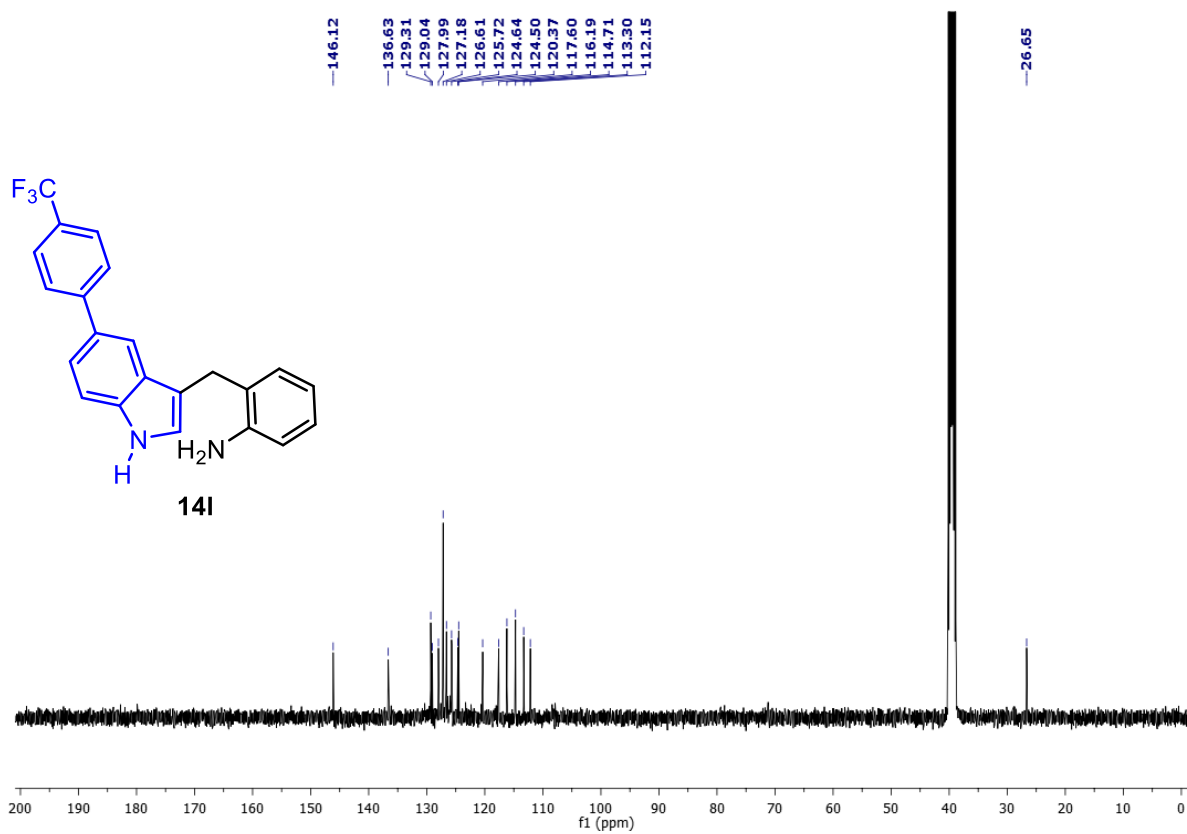

$^{19}\text{F}$  NMR Spectrum of **14I** (400 MHz,  $\text{CDCl}_3$ )

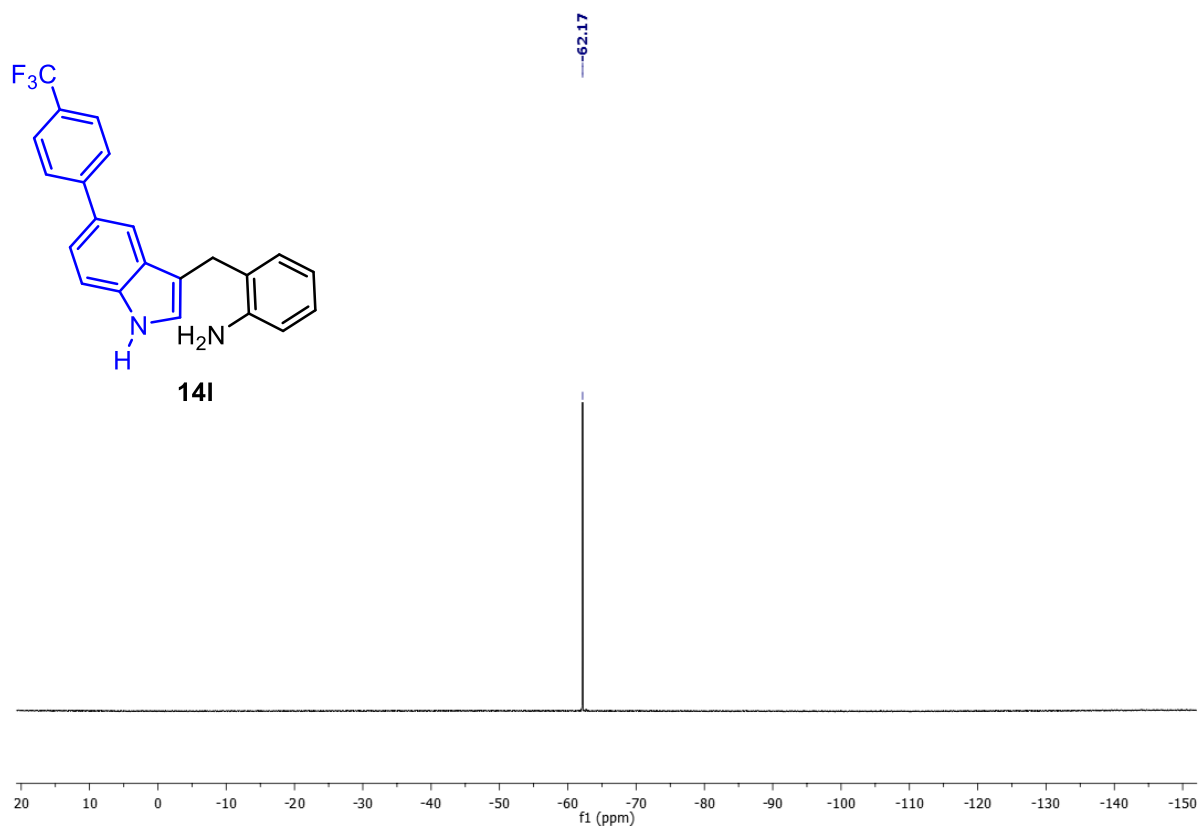

<sup>1</sup>H NMR Spectrum of **14m** (400 MHz, CDCl<sub>3</sub>)

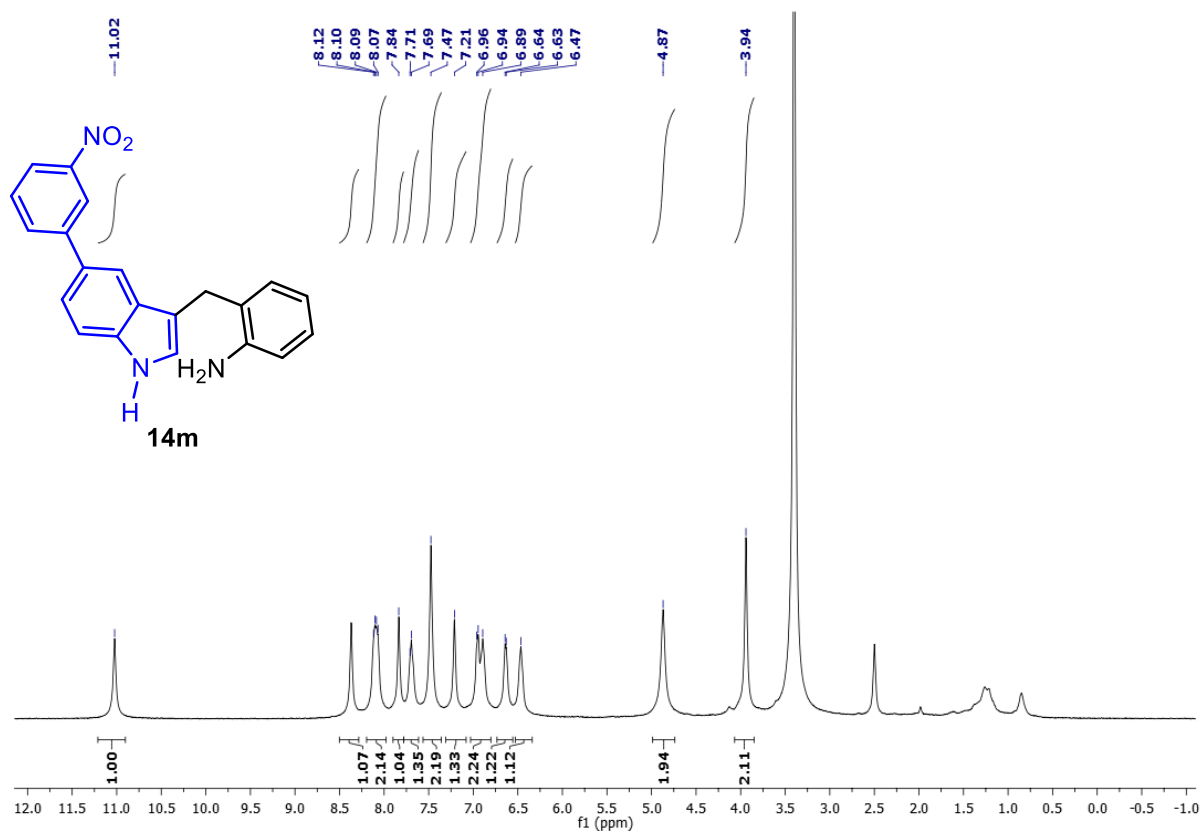

<sup>13</sup>C NMR Spectrum of **14m** (100 MHz, CDCl<sub>3</sub>)

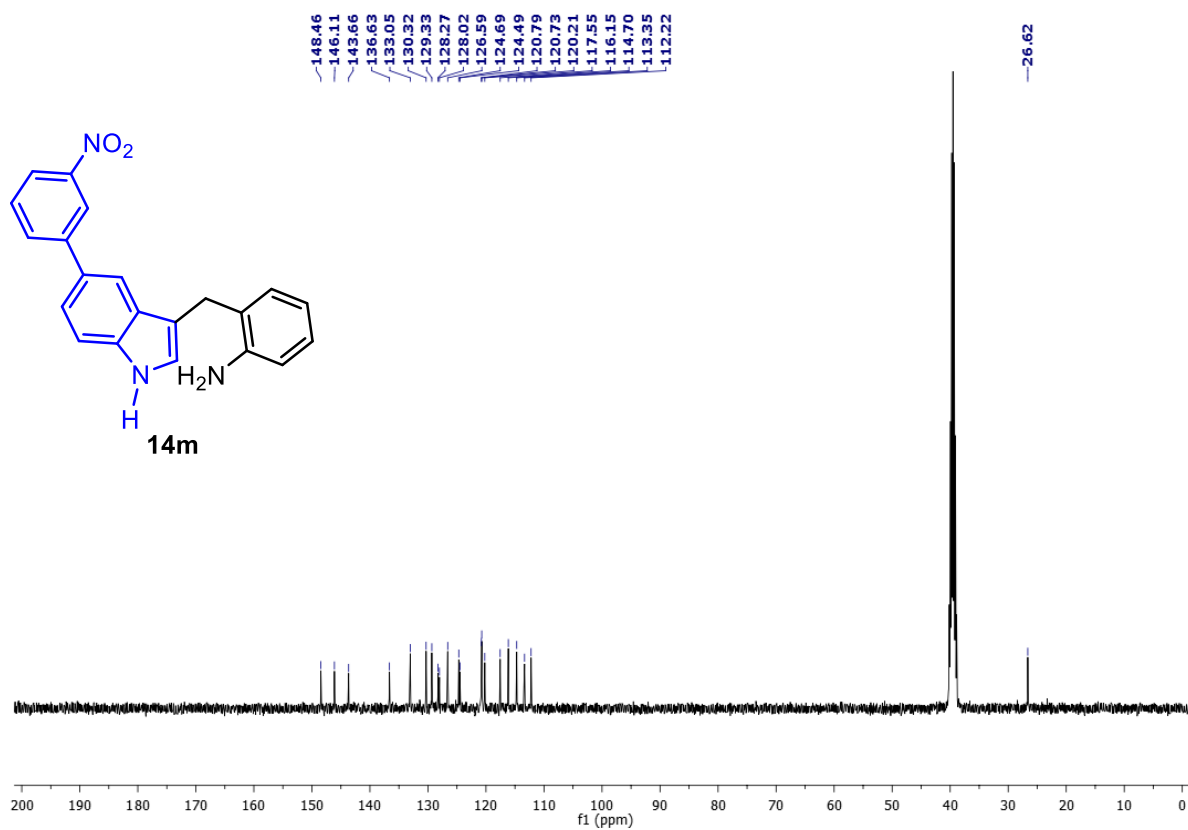

<sup>1</sup>H NMR Spectrum of **14n** (400 MHz, CDCl<sub>3</sub>)

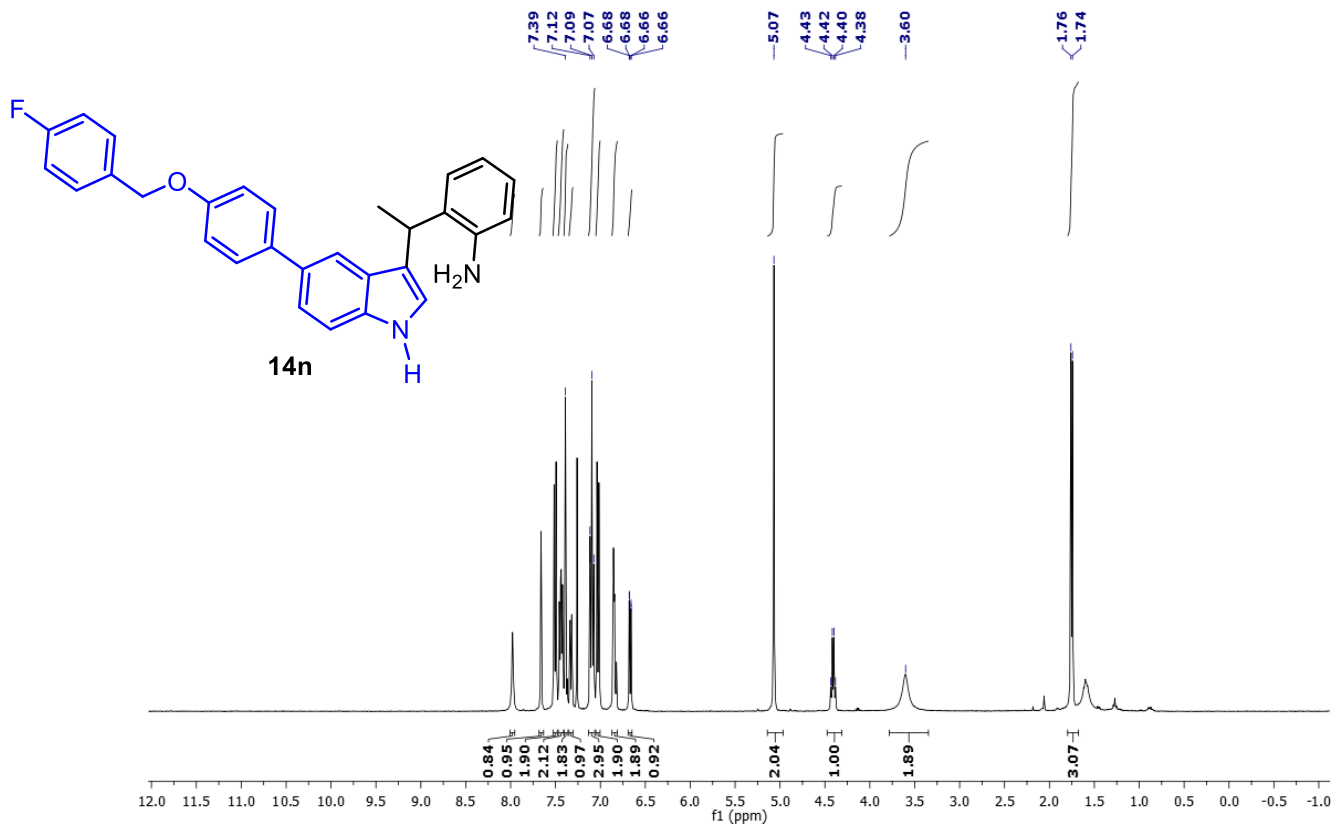

<sup>13</sup>C NMR Spectrum of **14n** (100 MHz, CDCl<sub>3</sub>)

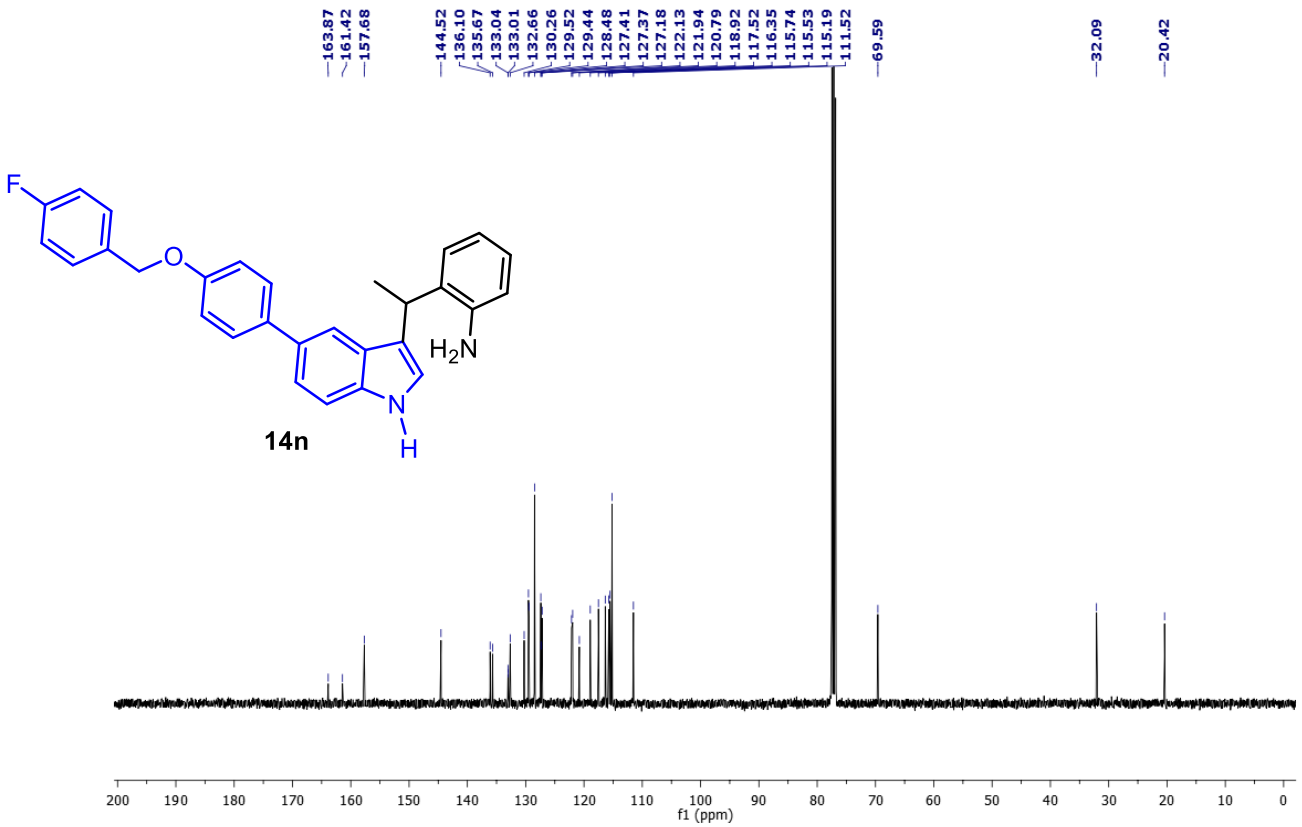

$^{19}\text{F}$  NMR Spectrum of **14n** (100 MHz,  $\text{CDCl}_3$ )

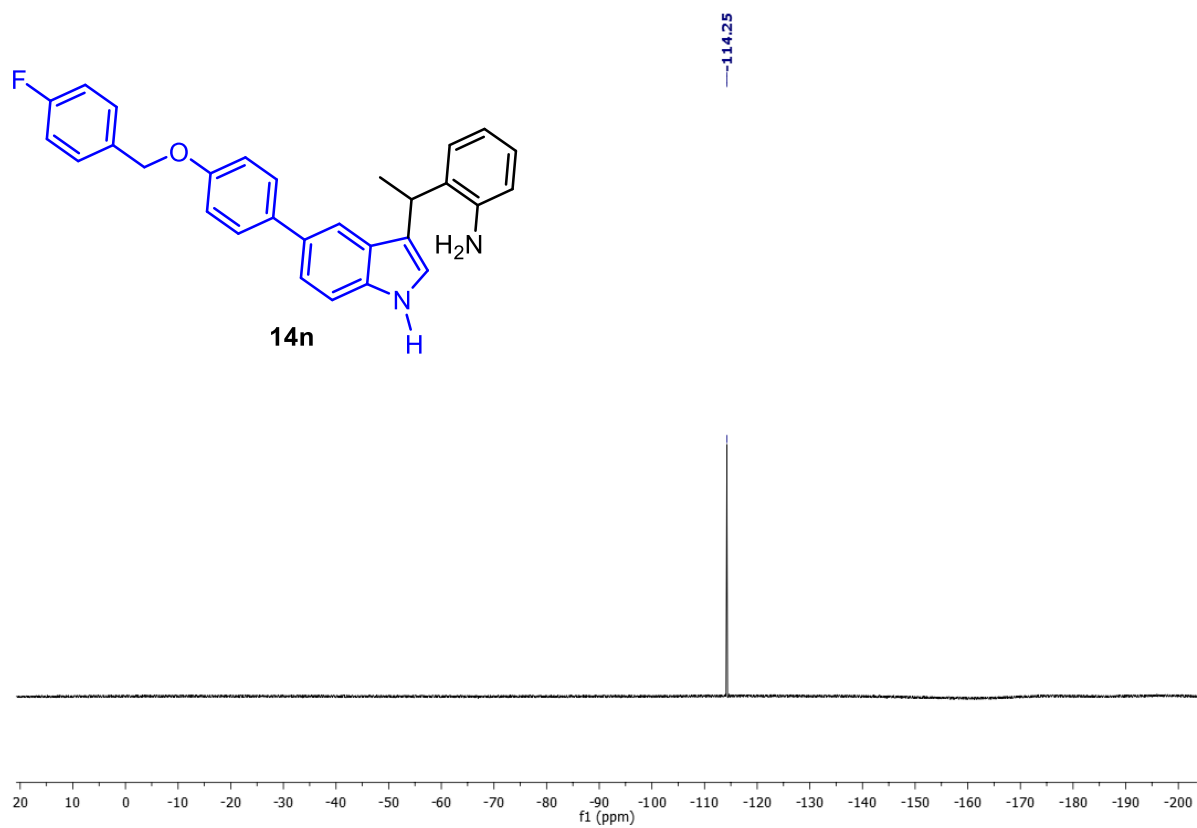

Supplement: d6md00221h1.pdf [file d6md00221h1.pdf]
